# Supplementary material for: The Influence of Learning on Host Plant Preference in a Significant Phytopathogen Vector, Diaphorina citri
Source: PLoS One. 2016 Mar 1;11(3):e0149815. doi: 10.1371/journal.pone.0149815 (PMC4773162; doi:10.1371/journal.pone.0149815)
Supplement: S1 Dataset — Each data file contains those data used for the experiments as described in the text. Each experiment is shown in a separate tab. The latency data collected from experiment 3 is shown in a separate tab as well. (XLSX) [file pone.0149815.s001.xlsx]

## Sheet: exp 1 - host preference
Developmental Host Preference Data									Host Swap Experiment Data
date	tod	rep	sex	treatment	choice	orientation	time(s)		date	rep	sex	reared on	Treatment	DOT	choice	orientation	time(s)
2014-09-29	pm	1	female	orange jasmine	orange jasmine	right	82		2015-01-05	1	female	orange jasmine	Sour orange	0	OJ	right	13
2014-09-29	pm	2	female	orange jasmine	sour orange	left	11		2015-01-05	2	female	orange jasmine	Sour orange	0	SO	left	43
2014-09-29	pm	3	female	orange jasmine	sour orange	left	60		2015-01-05	3	female	orange jasmine	Sour orange	0	SO	left	49
2014-09-29	pm	4	female	orange jasmine	orange jasmine	right	43		2015-01-05	4	female	orange jasmine	Sour orange	0	SO	left	16
2014-09-29	pm	5	female	orange jasmine	orange jasmine	right	40		2015-01-05	5	female	orange jasmine	Sour orange	0	OJ	right	24
2014-09-29	pm	6	female	orange jasmine	orange jasmine	right	51		2015-01-05	6	female	orange jasmine	Sour orange	0	OJ	right	16
2014-09-29	pm	7	female	orange jasmine	orange jasmine	right	31		2015-01-05	7	female	orange jasmine	Sour orange	0	OJ	right	39
2014-09-29	pm	8	female	orange jasmine	orange jasmine	right	111		2015-01-05	8	female	orange jasmine	Sour orange	0	OJ	left	24
2014-09-29	pm	9	female	orange jasmine	sour orange	left	131		2015-01-05	9	female	orange jasmine	Sour orange	0	OJ	left	38
2014-09-29	pm	10	female	orange jasmine	orange jasmine	right	12		2015-01-05	10	female	orange jasmine	Sour orange	0	SO	right	110
2014-09-29	pm	11	female	orange jasmine	sour orange	left	77		2015-01-05	11	female	orange jasmine	Sour orange	0	SO	right	43
2014-09-29	pm	12	female	orange jasmine	orange jasmine	right	178		2015-01-05	12	female	orange jasmine	Sour orange	0	OJ	left	153
2014-09-29	pm	13	female	orange jasmine	orange jasmine	right	74		2015-01-05	13	female	orange jasmine	Sour orange	0	OJ	left	41
2014-09-29	pm	14	female	orange jasmine	orange jasmine	right	53		2015-01-05	14	female	orange jasmine	Sour orange	0	OJ	left	21
2014-09-29	pm	15	female	orange jasmine	orange jasmine	right	97		2015-01-05	15	female	orange jasmine	Sour orange	0	SO	right	16
2014-09-29	pm	16	female	orange jasmine	sour orange	left	242		2015-01-05	16	female	orange jasmine	Sour orange	0	OJ	right	101
2014-09-30	pm	1	female	orange jasmine	orange jasmine	left	73		2015-01-05	17	female	orange jasmine	Sour orange	0	OJ	right	28
2014-09-30	pm	2	female	orange jasmine	sour orange	right	147		2015-01-05	18	female	orange jasmine	Sour orange	0	OJ	right	102
2014-09-30	pm	3	female	orange jasmine	orange jasmine	left	90		2015-01-05	19	female	orange jasmine	Sour orange	0	OJ	right	229
2014-09-30	pm	4	female	orange jasmine	orange jasmine	left	105		2015-01-05	20	female	orange jasmine	Sour orange	0	SO	left	84
2014-09-30	pm	5	female	orange jasmine	sour orange	right	21		2015-01-05	21	female	orange jasmine	Sour orange	0	OJ	right	77
2014-09-30	pm	6	female	orange jasmine	orange jasmine	left	154		2015-01-06	1	female	orange jasmine	Sour orange	1	SO	left	210
2014-09-30	pm	7	female	orange jasmine	sour orange	right	84		2015-01-06	2	female	orange jasmine	Sour orange	1	OJ	right	144
2014-09-30	pm	8	female	orange jasmine	orange jasmine	right	187		2015-01-06	3	female	orange jasmine	Sour orange	1	OJ	right	283
2014-09-30	pm	9	female	orange jasmine	orange jasmine	right	121		2015-01-06	4	female	orange jasmine	Sour orange	1	SO	left	97
2014-09-30	pm	10	female	orange jasmine	sour orange	left	47		2015-01-06	5	female	orange jasmine	Sour orange	1	SO	left	120
2014-09-30	pm	11	female	orange jasmine	sour orange	left	48		2015-01-06	6	female	orange jasmine	Sour orange	1	SO	right	24
2014-09-30	pm	12	female	orange jasmine	orange jasmine	right	118		2015-01-06	7	female	orange jasmine	Sour orange	1	OJ	left	108
2014-09-30	pm	13	female	orange jasmine	orange jasmine	right	163		2015-01-06	8	female	orange jasmine	Sour orange	1	OJ	left	173
2014-09-30	pm	14	female	orange jasmine	orange jasmine	right	89		2015-01-06	9	female	orange jasmine	Sour orange	1	SO	right	252
2014-09-30	pm	15	female	orange jasmine	orange jasmine	right	196		2015-01-06	10	female	orange jasmine	Sour orange	1	OJ	left	235
2014-09-30	pm	16	female	orange jasmine	nonresponsive	nonresponsive	300		2015-01-06	11	female	orange jasmine	Sour orange	1	OJ	left	66
2014-10-01	am	1	female	sour orange	sour orange	left	8		2015-01-06	12	female	orange jasmine	Sour orange	1	SO	right	158
2014-10-01	am	2	female	sour orange	sour orange	left	208		2015-01-06	13	female	orange jasmine	Sour orange	1	SO	right	37
2014-10-01	am	3	female	sour orange	sour orange	left	68		2015-01-06	14	female	orange jasmine	Sour orange	1	SO	right	206
2014-10-01	am	4	female	sour orange	sour orange	left	48		2015-01-06	15	female	orange jasmine	Sour orange	1	OJ	left	32
2014-10-01	am	5	female	sour orange	sour orange	left	120		2015-01-06	16	female	orange jasmine	Sour orange	1	SO	left	34
2014-10-01	am	6	female	sour orange	sour orange	left	14		2015-01-06	17	female	orange jasmine	Sour orange	1	SO	left	11
2014-10-01	am	7	female	sour orange	orange jasmine	right	12		2015-01-06	18	female	orange jasmine	Sour orange	1	OJ	right	31
2014-10-01	am	8	female	sour orange	sour orange	left	177		2015-01-06	19	female	orange jasmine	Sour orange	1	SO	left	114
2014-10-01	am	9	female	sour orange	orange jasmine	right	252		2015-01-06	20	female	orange jasmine	Sour orange	1	OJ	right	293
2014-10-01	am	10	female	sour orange	orange jasmine	right	19		2015-01-06	21	female	orange jasmine	Sour orange	1	OJ	right	80
2014-10-01	am	11	female	sour orange	sour orange	left	53		2015-01-07	1	female	orange jasmine	Sour orange	2	SO	right	94
2014-10-01	am	12	female	sour orange	orange jasmine	right	204		2015-01-07	2	female	orange jasmine	Sour orange	2	SO	right	21
2014-10-01	am	13	female	sour orange	sour orange	right	149		2015-01-07	3	female	orange jasmine	Sour orange	2	SO	right	260
2014-10-01	am	14	female	sour orange	sour orange	right	16		2015-01-07	4	female	orange jasmine	Sour orange	2	OJ	left	73
2014-10-01	am	15	female	sour orange	orange jasmine	left	39		2015-01-07	5	female	orange jasmine	Sour orange	2	SO	right	183
2014-10-01	am	16	female	sour orange	sour orange	right	151		2015-01-07	6	female	orange jasmine	Sour orange	2	OJ	left	162
2014-10-01	am	17	female	sour orange	orange jasmine	left	30		2015-01-07	7	female	orange jasmine	Sour orange	2	SO	right	110
2014-10-01	am	18	female	sour orange	orange jasmine	left	76		2015-01-07	8	female	orange jasmine	Sour orange	2	SO	right	52
2014-10-01	am	19	female	sour orange	sour orange	right	38		2015-01-07	9	female	orange jasmine	Sour orange	2	SO	right	54
2014-10-01	am	20	female	sour orange	sour orange	right	106		2015-01-07	10	female	orange jasmine	Sour orange	2	OJ	left	177
2014-10-01	am	21	female	sour orange	nonresponsive	nonresponsive	300		2015-01-07	11	female	orange jasmine	Sour orange	2	SO	left	65
2014-10-01	am	22	female	sour orange	nonresponsive	nonresponsive	300		2015-01-07	12	female	orange jasmine	Sour orange	2	SO	left	112
2014-10-03	am	1	female	sour orange	sour orange	left	56		2015-01-07	13	female	orange jasmine	Sour orange	2	OJ	right	181
2014-10-03	am	2	female	sour orange	sour orange	left	129		2015-01-07	14	female	orange jasmine	Sour orange	2	OJ	right	62
2014-10-03	am	3	female	sour orange	orange jasmine	right	186		2015-01-07	15	female	orange jasmine	Sour orange	2	SO	left	238
2014-10-03	am	4	female	sour orange	orange jasmine	right	282		2015-01-07	16	female	orange jasmine	Sour orange	2	SO	left	21
2014-10-03	am	5	female	sour orange	sour orange	left	297		2015-01-07	17	female	orange jasmine	Sour orange	2	SO	left	135
2014-10-03	am	6	female	sour orange	sour orange	left	150		2015-01-07	18	female	orange jasmine	Sour orange	2	OJ	right	86
2014-10-03	am	7	female	sour orange	sour orange	left	67		2015-01-07	19	female	orange jasmine	Sour orange	2	SO	left	39
2014-10-03	am	8	female	sour orange	orange jasmine	right	143		2015-01-07	20	female	orange jasmine	Sour orange	2	OJ	right	82
2014-10-03	am	9	female	sour orange	sour orange	left	59		2015-01-07	21	female	orange jasmine	Sour orange	2	SO	left	8
2014-10-03	am	10	female	sour orange	sour orange	left	26		2015-01-08	1	female	orange jasmine	Sour orange	3	SO	right	40
2014-10-03	am	11	female	sour orange	sour orange	left	4		2015-01-08	2	female	orange jasmine	Sour orange	3	OJ	left	6
2014-10-03	am	12	female	sour orange	orange jasmine	right	81		2015-01-08	3	female	orange jasmine	Sour orange	3	SO	right	180
2014-10-03	am	13	female	sour orange	orange jasmine	right	263		2015-01-08	4	female	orange jasmine	Sour orange	3	SO	right	186
2014-10-03	am	14	female	sour orange	sour orange	left	206		2015-01-08	5	female	orange jasmine	Sour orange	3	SO	right	49
2014-10-03	am	15	female	sour orange	sour orange	left	115		2015-01-08	6	female	orange jasmine	Sour orange	3	SO	right	31
2014-10-03	am	16	female	sour orange	sour orange	left	63		2015-01-08	7	female	orange jasmine	Sour orange	3	SO	right	210
2014-10-03	am	17	female	sour orange	nonresponsive	nonresponsive	300		2015-01-08	8	female	orange jasmine	Sour orange	3	OJ	left	172
									2015-01-08	9	female	orange jasmine	Sour orange	3	OJ	left	185
									2015-01-08	10	female	orange jasmine	Sour orange	3	OJ	left	99
									2015-01-08	11	female	orange jasmine	Sour orange	3	OJ	right	12
									2015-01-08	12	female	orange jasmine	Sour orange	3	OJ	right	44
									2015-01-08	13	female	orange jasmine	Sour orange	3	SO	left	66
									2015-01-08	14	female	orange jasmine	Sour orange	3	OJ	right	26
									2015-01-08	15	female	orange jasmine	Sour orange	3	SO	left	55
									2015-01-08	16	female	orange jasmine	Sour orange	3	SO	left	139
									2015-01-08	17	female	orange jasmine	Sour orange	3	SO	left	151
									2015-01-08	18	female	orange jasmine	Sour orange	3	SO	left	132
									2015-01-08	19	female	orange jasmine	Sour orange	3	SO	left	141
									2015-01-08	20	female	orange jasmine	Sour orange	3	SO	left	27
									2015-01-08	21	female	orange jasmine	Sour orange	3	SO	left	13
									2015-01-12	1	female	orange jasmine	Sour orange	7	SO	right	254
									2015-01-12	2	female	orange jasmine	Sour orange	7	SO	right	103
									2015-01-12	3	female	orange jasmine	Sour orange	7	SO	right	160
									2015-01-12	4	female	orange jasmine	Sour orange	7	SO	right	147
									2015-01-12	5	female	orange jasmine	Sour orange	7	OJ	left	29
									2015-01-12	6	female	orange jasmine	Sour orange	7	SO	right	121
									2015-01-12	7	female	orange jasmine	Sour orange	7	OJ	left	162
									2015-01-12	8	female	orange jasmine	Sour orange	7	SO	right	44
									2015-01-12	9	female	orange jasmine	Sour orange	7	SO	right	5
									2015-01-12	10	female	orange jasmine	Sour orange	7	OJ	left	78
									2015-01-12	11	female	orange jasmine	Sour orange	7	SO	left	26
									2015-01-12	12	female	orange jasmine	Sour orange	7	SO	left	164
									2015-01-12	13	female	orange jasmine	Sour orange	7	SO	left	17
									2015-01-12	14	female	orange jasmine	Sour orange	7	OJ	right	19
									2015-01-12	15	female	orange jasmine	Sour orange	7	OJ	right	62
									2015-01-12	16	female	orange jasmine	Sour orange	7	SO	left	114
									2015-01-12	17	female	orange jasmine	Sour orange	7	OJ	right	44
									2015-01-12	18	female	orange jasmine	Sour orange	7	OJ	right	63
									2015-01-12	19	female	orange jasmine	Sour orange	7	OJ	right	195
									2015-01-12	20	female	orange jasmine	Sour orange	7	SO	left	167
									2015-01-12	21	female	orange jasmine	Sour orange	7	SO	left	132
									2015-01-13	1	female	orange jasmine	Sour orange	1	SO	left	292
									2015-01-13	2	female	orange jasmine	Sour orange	1	OJ	right	37
									2015-01-13	3	female	orange jasmine	Sour orange	1	OJ	right	8
									2015-01-13	4	female	orange jasmine	Sour orange	1	SO	left	417
									2015-01-13	5	female	orange jasmine	Sour orange	1	SO	left	13
									2015-01-13	6	female	orange jasmine	Sour orange	1	SO	left	53
									2015-01-13	7	female	orange jasmine	Sour orange	1	OJ	right	238
									2015-01-13	8	female	orange jasmine	Sour orange	1	OJ	right	27
									2015-01-13	9	female	orange jasmine	Sour orange	1	SO	left	33
									2015-01-13	10	female	orange jasmine	Sour orange	1	OJ	right	185
									2015-01-13	11	female	orange jasmine	Sour orange	1	OJ	right	172
									2015-01-13	12	female	orange jasmine	Sour orange	1	OJ	left	102
									2015-01-13	13	female	orange jasmine	Sour orange	1	OJ	left	11
									2015-01-13	14	female	orange jasmine	Sour orange	1	SO	right	109
									2015-01-13	15	female	orange jasmine	Sour orange	1	SO	right	16
									2015-01-13	16	female	orange jasmine	Sour orange	1	OJ	left	55
									2015-01-13	17	female	orange jasmine	Sour orange	1	SO	right	151
									2015-01-13	18	female	orange jasmine	Sour orange	1	OJ	left	22
									2015-01-13	19	female	orange jasmine	Sour orange	1	SO	right	414
									2015-01-13	20	female	orange jasmine	Sour orange	1	SO	right	71
									2015-01-13	21	female	orange jasmine	Sour orange	1	SO	right	104
									2015-01-14	1	female	orange jasmine	Sour orange	2	SO	right	43
									2015-01-14	2	female	orange jasmine	Sour orange	2	SO	right	143
									2015-01-14	3	female	orange jasmine	Sour orange	2	SO	right	209
									2015-01-14	4	female	orange jasmine	Sour orange	2	SO	right	17
									2015-01-14	5	female	orange jasmine	Sour orange	2	SO	right	103
									2015-01-14	6	female	orange jasmine	Sour orange	2	OJ	left	140
									2015-01-14	7	female	orange jasmine	Sour orange	2	SO	right	121
									2015-01-14	8	female	orange jasmine	Sour orange	2	OJ	left	14
									2015-01-14	9	female	orange jasmine	Sour orange	2	SO	right	44
									2015-01-14	10	female	orange jasmine	Sour orange	2	OJ	left	121
									2015-01-14	11	female	orange jasmine	Sour orange	2	SO	right	62
									2015-01-14	12	female	orange jasmine	Sour orange	2	OJ	right	89
									2015-01-14	13	female	orange jasmine	Sour orange	2	OJ	right	139
									2015-01-14	14	female	orange jasmine	Sour orange	2	OJ	right	25
									2015-01-14	15	female	orange jasmine	Sour orange	2	OJ	right	68
									2015-01-14	16	female	orange jasmine	Sour orange	2	OJ	right	51
									2015-01-14	17	female	orange jasmine	Sour orange	2	SO	left	21
									2015-01-14	18	female	orange jasmine	Sour orange	2	SO	left	58
									2015-01-14	19	female	orange jasmine	Sour orange	2	SO	left	97
									2015-01-14	20	female	orange jasmine	Sour orange	2	SO	left	85
									2015-01-14	21	female	orange jasmine	Sour orange	2	OJ	right	74
									2015-01-15	1	female	orange jasmine	Sour orange	3	OJ	right	25
									2015-01-15	2	female	orange jasmine	Sour orange	3	SO	left	37
									2015-01-15	3	female	orange jasmine	Sour orange	3	SO	left	198
									2015-01-15	4	female	orange jasmine	Sour orange	3	SO	left	192
									2015-01-15	5	female	orange jasmine	Sour orange	3	SO	left	143
									2015-01-15	6	female	orange jasmine	Sour orange	3	OJ	right	207
									2015-01-15	7	female	orange jasmine	Sour orange	3	OJ	left	157
									2015-01-15	8	female	orange jasmine	Sour orange	3	SO	left	163
									2015-01-15	9	female	orange jasmine	Sour orange	3	OJ	right	232
									2015-01-15	10	female	orange jasmine	Sour orange	3	OJ	left	197
									2015-01-15	11	female	orange jasmine	Sour orange	3	OJ	left	13
									2015-01-15	12	female	orange jasmine	Sour orange	3	SO	right	102
									2015-01-15	13	female	orange jasmine	Sour orange	3	SO	right	100
									2015-01-15	14	female	orange jasmine	Sour orange	3	OJ	left	7
									2015-01-15	15	female	orange jasmine	Sour orange	3	SO	right	296
									2015-01-15	16	female	orange jasmine	Sour orange	3	SO	right	43
									2015-01-15	17	female	orange jasmine	Sour orange	3	OJ	left	21
									2015-01-15	18	female	orange jasmine	Sour orange	3	OJ	left	210
									2015-01-15	19	female	orange jasmine	Sour orange	3	SO	right	84
									2015-01-15	20	female	orange jasmine	Sour orange	3	SO	right	200
									2015-01-15	21	female	orange jasmine	Sour orange	3	SO	right	149
									2015-01-19	1	female	orange jasmine	Sour orange	7	OJ	left	81
									2015-01-19	2	female	orange jasmine	Sour orange	7	SO	right	496
									2015-01-19	3	female	orange jasmine	Sour orange	7	OJ	left	18
									2015-01-19	4	female	orange jasmine	Sour orange	7	OJ	left	7
									2015-01-19	5	female	orange jasmine	Sour orange	7	SO	right	20
									2015-01-19	6	female	orange jasmine	Sour orange	7	OJ	left	64
									2015-01-19	7	female	orange jasmine	Sour orange	7	OJ	left	74
									2015-01-19	8	female	orange jasmine	Sour orange	7	OJ	left	111
									2015-01-19	9	female	orange jasmine	Sour orange	7	SO	right	81
									2015-01-19	10	female	orange jasmine	Sour orange	7	OJ	left	220
									2015-01-19	11	female	orange jasmine	Sour orange	7	OJ	right	58
									2015-01-19	12	female	orange jasmine	Sour orange	7	SO	left	15
									2015-01-19	13	female	orange jasmine	Sour orange	7	OJ	right	223
									2015-01-19	14	female	orange jasmine	Sour orange	7	SO	left	24
									2015-01-19	15	female	orange jasmine	Sour orange	7	SO	left	44
									2015-01-19	16	female	orange jasmine	Sour orange	7	SO	left	37
									2015-01-19	17	female	orange jasmine	Sour orange	7	OJ	right	92
									2015-01-19	18	female	orange jasmine	Sour orange	7	OJ	right	58
									2015-01-19	19	female	orange jasmine	Sour orange	7	SO	left	150
									2015-01-19	20	female	orange jasmine	Sour orange	7	SO	left	276
									date	rep	sex	reared on	Treatment	DOT	choice	orientation	time(s)
									2015-01-27	1	female	orange jasmine	orange jasmine	0	SO	right	19
									2015-01-27	2	female	orange jasmine	orange jasmine	0	SO	right	54
									2015-01-27	3	female	orange jasmine	orange jasmine	0	OJ	left	84
									2015-01-27	4	female	orange jasmine	orange jasmine	0	OJ	left	240
									2015-01-27	5	female	orange jasmine	orange jasmine	0	SO	right	132
									2015-01-27	6	female	orange jasmine	orange jasmine	0	SO	right	161
									2015-01-27	7	female	orange jasmine	orange jasmine	0	OJ	left	86
									2015-01-27	8	female	orange jasmine	orange jasmine	0	OJ	left	99
									2015-01-27	9	female	orange jasmine	orange jasmine	0	SO	right	109
									2015-01-27	10	female	orange jasmine	orange jasmine	0	SO	right	140
									2015-01-27	11	female	orange jasmine	orange jasmine	0	SO	left	71
									2015-01-27	12	female	orange jasmine	orange jasmine	0	OJ	right	128
									2015-01-27	13	female	orange jasmine	orange jasmine	0	OJ	right	66
									2015-01-27	14	female	orange jasmine	orange jasmine	0	OJ	right	50
									2015-01-27	15	female	orange jasmine	orange jasmine	0	OJ	right	154
									2015-01-27	16	female	orange jasmine	orange jasmine	0	SO	left	151
									2015-01-27	17	female	orange jasmine	orange jasmine	0	OJ	right	195
									2015-01-27	18	female	orange jasmine	orange jasmine	0	OJ	right	34
									2015-01-27	19	female	orange jasmine	orange jasmine	0	OJ	right	113
									2015-01-27	20	female	orange jasmine	orange jasmine	0	OJ	right	47
									2015-01-27	21	female	orange jasmine	orange jasmine	0	OJ	right	40
									2015-01-28	1	female	orange jasmine	orange jasmine	1	OJ	right	24
									2015-01-28	2	female	orange jasmine	orange jasmine	1	OJ	right	76
									2015-01-28	3	female	orange jasmine	orange jasmine	1	OJ	right	90
									2015-01-28	4	female	orange jasmine	orange jasmine	1	OJ	right	12
									2015-01-28	5	female	orange jasmine	orange jasmine	1	SO	left	33
									2015-01-28	6	female	orange jasmine	orange jasmine	1	OJ	right	47
									2015-01-28	7	female	orange jasmine	orange jasmine	1	OJ	right	52
									2015-01-28	8	female	orange jasmine	orange jasmine	1	SO	left	211
									2015-01-28	9	female	orange jasmine	orange jasmine	1	SO	left	90
									2015-01-28	10	female	orange jasmine	orange jasmine	1	OJ	right	154
									2015-01-28	11	female	orange jasmine	orange jasmine	1	OJ	left	62
									2015-01-28	12	female	orange jasmine	orange jasmine	1	SO	right	17
									2015-01-28	13	female	orange jasmine	orange jasmine	1	OJ	left	13
									2015-01-28	14	female	orange jasmine	orange jasmine	1	SO	right	199
									2015-01-28	15	female	orange jasmine	orange jasmine	1	OJ	left	104
									2015-01-28	16	female	orange jasmine	orange jasmine	1	OJ	left	100
									2015-01-28	17	female	orange jasmine	orange jasmine	1	OJ	left	81
									2015-01-28	18	female	orange jasmine	orange jasmine	1	OJ	left	152
									2015-01-28	19	female	orange jasmine	orange jasmine	1	SO	right	87
									2015-01-28	20	female	orange jasmine	orange jasmine	1	SO	right	291
									2015-01-29	1	female	orange jasmine	orange jasmine	2	OJ	left	110
									2015-01-29	2	female	orange jasmine	orange jasmine	2	SO	right	251
									2015-01-29	3	female	orange jasmine	orange jasmine	2	OJ	left	208
									2015-01-29	4	female	orange jasmine	orange jasmine	2	SO	right	151
									2015-01-29	5	female	orange jasmine	orange jasmine	2	OJ	left	27
									2015-01-29	6	female	orange jasmine	orange jasmine	2	SO	left	170
									2015-01-29	7	female	orange jasmine	orange jasmine	2	SO	left	63
									2015-01-29	8	female	orange jasmine	orange jasmine	2	SO	left	243
									2015-01-29	9	female	orange jasmine	orange jasmine	2	OJ	right	72
									2015-01-29	10	female	orange jasmine	orange jasmine	2	OJ	right	23
									2015-01-29	11	female	orange jasmine	orange jasmine	2	SO	left	83
									2015-01-29	12	female	orange jasmine	orange jasmine	2	OJ	right	151
									2015-01-29	13	female	orange jasmine	orange jasmine	2	OJ	right	14
									2015-01-29	14	female	orange jasmine	orange jasmine	2	OJ	right	185
									2015-01-29	15	female	orange jasmine	orange jasmine	2	SO	left	45
									2015-01-29	16	female	orange jasmine	orange jasmine	2	SO	left	36
									2015-01-29	17	female	orange jasmine	orange jasmine	2	OJ	right	78
									2015-01-29	18	female	orange jasmine	orange jasmine	2	OJ	right	40
									2015-01-29	19	female	orange jasmine	orange jasmine	2	OJ	right	120
									2015-01-30	1	female	orange jasmine	orange jasmine	3	OJ	right	81
									2015-01-30	2	female	orange jasmine	orange jasmine	3	OJ	right	156
									2015-01-30	3	female	orange jasmine	orange jasmine	3	SO	left	75
									2015-01-30	4	female	orange jasmine	orange jasmine	3	SO	left	36
									2015-01-30	5	female	orange jasmine	orange jasmine	3	OJ	right	71
									2015-01-30	6	female	orange jasmine	orange jasmine	3	OJ	right	56
									2015-01-30	7	female	orange jasmine	orange jasmine	3	OJ	right	77
									2015-01-30	8	female	orange jasmine	orange jasmine	3	OJ	right	79
									2015-01-30	9	female	orange jasmine	orange jasmine	3	OJ	right	172
									2015-01-30	10	female	orange jasmine	orange jasmine	3	SO	left	10
									2015-01-30	11	female	orange jasmine	orange jasmine	3	SO	right	37
									2015-01-30	12	female	orange jasmine	orange jasmine	3	OJ	left	49
									2015-01-30	13	female	orange jasmine	orange jasmine	3	OJ	left	47
									2015-01-30	14	female	orange jasmine	orange jasmine	3	OJ	left	80
									2015-01-30	15	female	orange jasmine	orange jasmine	3	SO	right	147
									2015-01-30	16	female	orange jasmine	orange jasmine	3	OJ	left	126
									2015-01-30	17	female	orange jasmine	orange jasmine	3	OJ	left	51
									2015-01-30	18	female	orange jasmine	orange jasmine	3	SO	right	113
									2015-01-30	19	female	orange jasmine	orange jasmine	3	SO	right	16
									2015-01-30	20	female	orange jasmine	orange jasmine	3	SO	right	26
									2015-01-30	21	female	orange jasmine	orange jasmine	3	OJ	left	78
									2015-02-16	1	female	orange jasmine	orange jasmine	0	OJ	right	96
									2015-02-16	2	female	orange jasmine	orange jasmine	0	OJ	right	91
									2015-02-16	3	female	orange jasmine	orange jasmine	0	OJ	right	121
									2015-02-16	4	female	orange jasmine	orange jasmine	0	OJ	right	280
									2015-02-16	5	female	orange jasmine	orange jasmine	0	OJ	right	247
									2015-02-16	6	female	orange jasmine	orange jasmine	0	OJ	right	41
									2015-02-16	7	female	orange jasmine	orange jasmine	0	SO	left	201
									2015-02-16	8	female	orange jasmine	orange jasmine	0	OJ	right	86
									2015-02-16	9	female	orange jasmine	orange jasmine	0	SO	left	12
									2015-02-16	10	female	orange jasmine	orange jasmine	0	OJ	right	75
									2015-02-16	11	female	orange jasmine	orange jasmine	0	SO	left	77
									2015-02-16	12	female	orange jasmine	orange jasmine	0	OJ	right	56
									2015-02-16	13	female	orange jasmine	orange jasmine	0	OJ	right	124
									2015-02-16	14	female	orange jasmine	orange jasmine	0	SO	left	125
									2015-02-16	15	female	orange jasmine	orange jasmine	0	SO	left	26
									2015-02-17	1	female	orange jasmine	orange jasmine	1	OJ	right	134
									2015-02-17	2	female	orange jasmine	orange jasmine	1	SO	left	121
									2015-02-17	3	female	orange jasmine	orange jasmine	1	OJ	right	82
									2015-02-17	4	female	orange jasmine	orange jasmine	1	OJ	right	156
									2015-02-17	5	female	orange jasmine	orange jasmine	1	OJ	right	48
									2015-02-17	6	female	orange jasmine	orange jasmine	1	SO	left	75
									2015-02-17	7	female	orange jasmine	orange jasmine	1	OJ	right	14
									2015-02-17	8	female	orange jasmine	orange jasmine	1	OJ	left	15
									2015-02-17	9	female	orange jasmine	orange jasmine	1	SO	right	48
									2015-02-17	10	female	orange jasmine	orange jasmine	1	OJ	left	84
									2015-02-17	11	female	orange jasmine	orange jasmine	1	OJ	left	45
									2015-02-17	12	female	orange jasmine	orange jasmine	1	OJ	left	85
									2015-02-17	13	female	orange jasmine	orange jasmine	1	SO	right	97
									2015-02-18	1	female	orange jasmine	orange jasmine	2	SO	left	22
									2015-02-18	2	female	orange jasmine	orange jasmine	2	OJ	right	125
									2015-02-18	3	female	orange jasmine	orange jasmine	2	OJ	right	145
									2015-02-18	4	female	orange jasmine	orange jasmine	2	OJ	right	27
									2015-02-18	5	female	orange jasmine	orange jasmine	2	SO	left	13
									2015-02-18	6	female	orange jasmine	orange jasmine	2	OJ	right	23
									2015-02-18	7	female	orange jasmine	orange jasmine	2	OJ	right	82
									2015-02-18	8	female	orange jasmine	orange jasmine	2	SO	right	46
									2015-02-18	9	female	orange jasmine	orange jasmine	2	OJ	left	68
									2015-02-18	10	female	orange jasmine	orange jasmine	2	OJ	left	201
									2015-02-18	11	female	orange jasmine	orange jasmine	2	OJ	left	57
									2015-02-18	12	female	orange jasmine	orange jasmine	2	OJ	left	23
									2015-02-18	13	female	orange jasmine	orange jasmine	2	OJ	left	98
									2015-02-18	14	female	orange jasmine	orange jasmine	2	OJ	left	91
									2015-02-18	15	female	orange jasmine	orange jasmine	2	SO	right	82
									2015-02-19	1	female	orange jasmine	orange jasmine	3	SO	right	234
									2015-02-19	2	female	orange jasmine	orange jasmine	3	OJ	left	36
									2015-02-19	3	female	orange jasmine	orange jasmine	3	OJ	left	67
									2015-02-19	4	female	orange jasmine	orange jasmine	3	OJ	left	18
									2015-02-19	5	female	orange jasmine	orange jasmine	3	OJ	left	39
									2015-02-19	6	female	orange jasmine	orange jasmine	3	SO	right	81
									2015-02-19	7	female	orange jasmine	orange jasmine	3	OJ	left	23
									2015-02-19	8	female	orange jasmine	orange jasmine	3	SO	left	102
									2015-02-19	9	female	orange jasmine	orange jasmine	3	OJ	right	107
									2015-02-19	10	female	orange jasmine	orange jasmine	3	OJ	right	35
									2015-02-19	11	female	orange jasmine	orange jasmine	3	SO	left	51
									2015-02-19	12	female	orange jasmine	orange jasmine	3	OJ	right	71
									2015-02-19	13	female	orange jasmine	orange jasmine	3	SO	left	68
									2015-02-19	14	female	orange jasmine	orange jasmine	3	OJ	right	125
									2015-02-19	15	female	orange jasmine	orange jasmine	3	SO	left	143
									date	trial	sex	host	Treatment	DOT	choice	orientation	time(s)
									2015-04-06	1	female	Sour Orange	Orange Jasmine	0	SO	right	207
									2015-04-06	2	female	Sour Orange	Orange Jasmine	0	OJ	left	94
									2015-04-06	3	female	Sour Orange	Orange Jasmine	0	SO	right	18
									2015-04-06	4	female	Sour Orange	Orange Jasmine	0	OJ	left	162
									2015-04-06	5	female	Sour Orange	Orange Jasmine	0	SO	right	34
									2015-04-06	6	female	Sour Orange	Orange Jasmine	0	SO	right	27
									2015-04-06	7	female	Sour Orange	Orange Jasmine	0	SO	right	51
									2015-04-06	8	female	Sour Orange	Orange Jasmine	0	OJ	left	8
									2015-04-06	9	female	Sour Orange	Orange Jasmine	0	SO	right	96
									2015-04-06	10	female	Sour Orange	Orange Jasmine	0	OJ	left	165
									2015-04-06	11	female	Sour Orange	Orange Jasmine	0	OJ	right	208
									2015-04-06	12	female	Sour Orange	Orange Jasmine	0	SO	left	62
									2015-04-06	13	female	Sour Orange	Orange Jasmine	0	SO	left	225
									2015-04-06	14	female	Sour Orange	Orange Jasmine	0	OJ	right	47
									2015-04-06	15	female	Sour Orange	Orange Jasmine	0	SO	left	19
									2015-04-06	16	female	Sour Orange	Orange Jasmine	0	SO	left	135
									2015-04-06	17	female	Sour Orange	Orange Jasmine	0	SO	left	28
									2015-04-06	18	female	Sour Orange	Orange Jasmine	0	SO	left	19
									2015-04-06	19	female	Sour Orange	Orange Jasmine	0	SO	left	99
									2015-04-07	1	female	Sour Orange	Orange Jasmine	1	OJ	right	72
									2015-04-07	2	female	Sour Orange	Orange Jasmine	1	OJ	right	139
									2015-04-07	3	female	Sour Orange	Orange Jasmine	1	SO	left	33
									2015-04-07	4	female	Sour Orange	Orange Jasmine	1	SO	left	64
									2015-04-07	5	female	Sour Orange	Orange Jasmine	1	SO	left	234
									2015-04-07	6	female	Sour Orange	Orange Jasmine	1	OJ	right	116
									2015-04-07	7	female	Sour Orange	Orange Jasmine	1	OJ	right	64
									2015-04-07	8	female	Sour Orange	Orange Jasmine	1	OJ	right	114
									2015-04-07	9	female	Sour Orange	Orange Jasmine	1	OJ	right	32
									2015-04-07	10	female	Sour Orange	Orange Jasmine	1	SO	left	98
									2015-04-07	11	female	Sour Orange	Orange Jasmine	1	OJ	left	92
									2015-04-07	12	female	Sour Orange	Orange Jasmine	1	SO	right	78
									2015-04-07	13	female	Sour Orange	Orange Jasmine	1	OJ	left	63
									2015-04-07	14	female	Sour Orange	Orange Jasmine	1	SO	right	98
									2015-04-07	15	female	Sour Orange	Orange Jasmine	1	SO	right	32
									2015-04-07	16	female	Sour Orange	Orange Jasmine	1	SO	right	76
									2015-04-07	17	female	Sour Orange	Orange Jasmine	1	SO	right	38
									2015-04-07	18	female	Sour Orange	Orange Jasmine	1	OJ	left	177
									2015-04-07	19	female	Sour Orange	Orange Jasmine	1	OJ	left	95
									2015-04-07	20	female	Sour Orange	Orange Jasmine	1	SO	right	133
									2015-04-08	1	female	Sour Orange	Orange Jasmine	2	OJ	right	251
									2015-04-08	2	female	Sour Orange	Orange Jasmine	2	OJ	right	189
									2015-04-08	3	female	Sour Orange	Orange Jasmine	2	OJ	right	126
									2015-04-08	4	female	Sour Orange	Orange Jasmine	2	OJ	right	33
									2015-04-08	5	female	Sour Orange	Orange Jasmine	2	SO	left	62
									2015-04-08	6	female	Sour Orange	Orange Jasmine	2	SO	left	42
									2015-04-08	7	female	Sour Orange	Orange Jasmine	2	OJ	right	113
									2015-04-08	8	female	Sour Orange	Orange Jasmine	2	OJ	right	291
									2015-04-08	9	female	Sour Orange	Orange Jasmine	2	OJ	left	176
									2015-04-08	10	female	Sour Orange	Orange Jasmine	2	OJ	left	178
									2015-04-08	11	female	Sour Orange	Orange Jasmine	2	OJ	left	163
									2015-04-08	12	female	Sour Orange	Orange Jasmine	2	SO	right	257
									2015-04-08	13	female	Sour Orange	Orange Jasmine	2	SO	right	202
									2015-04-08	14	female	Sour Orange	Orange Jasmine	2	OJ	left	114
									2015-04-08	15	female	Sour Orange	Orange Jasmine	2	OJ	left	153
									2015-04-08	16	female	Sour Orange	Orange Jasmine	2	SO	right	122
									2015-04-08	17	female	Sour Orange	Orange Jasmine	2	OJ	left	42
									2015-04-08	18	female	Sour Orange	Orange Jasmine	2	SO	right	125
									2015-04-08	19	female	Sour Orange	Orange Jasmine	2	SO	right	278
									2015-04-09	1	female	Sour Orange	Orange Jasmine	3	SO	left	152
									2015-04-09	2	female	Sour Orange	Orange Jasmine	3	OJ	right	69
									2015-04-09	3	female	Sour Orange	Orange Jasmine	3	OJ	right	215
									2015-04-09	4	female	Sour Orange	Orange Jasmine	3	OJ	right	282
									2015-04-09	5	female	Sour Orange	Orange Jasmine	3	SO	left	63
									2015-04-09	6	female	Sour Orange	Orange Jasmine	3	OJ	right	35
									2015-04-09	7	female	Sour Orange	Orange Jasmine	3	SO	left	78
									2015-04-09	8	female	Sour Orange	Orange Jasmine	3	OJ	right	143
									2015-04-09	9	female	Sour Orange	Orange Jasmine	3	OJ	right	182
									2015-04-09	10	female	Sour Orange	Orange Jasmine	3	OJ	left	151
									2015-04-09	11	female	Sour Orange	Orange Jasmine	3	OJ	left	60
									2015-04-09	12	female	Sour Orange	Orange Jasmine	3	OJ	left	127
									2015-04-09	13	female	Sour Orange	Orange Jasmine	3	SO	right	141
									2015-04-09	14	female	Sour Orange	Orange Jasmine	3	OJ	left	232
									2015-04-09	15	female	Sour Orange	Orange Jasmine	3	OJ	left	130
									2015-04-09	16	female	Sour Orange	Orange Jasmine	3	SO	right	93
									2015-05-11	1	female	Sour Orange	Orange Jasmine	0	OJ	right	73
									2015-05-11	2	female	Sour Orange	Orange Jasmine	0	SO	left	20
									2015-05-11	3	female	Sour Orange	Orange Jasmine	0	SO	left	83
									2015-05-11	4	female	Sour Orange	Orange Jasmine	0	SO	left	34
									2015-05-11	5	female	Sour Orange	Orange Jasmine	0	SO	left	45
									2015-05-11	6	female	Sour Orange	Orange Jasmine	0	SO	right	134
									2015-05-11	7	female	Sour Orange	Orange Jasmine	0	OJ	left	15
									2015-05-11	8	female	Sour Orange	Orange Jasmine	0	OJ	left	21
									2015-05-11	9	female	Sour Orange	Orange Jasmine	0	OJ	left	124
									2015-05-11	10	female	Sour Orange	Orange Jasmine	0	SO	right	173
									2015-05-11	11	female	Sour Orange	Orange Jasmine	0	SO	left	140
									2015-05-11	12	female	Sour Orange	Orange Jasmine	0	SO	left	204
									2015-05-11	13	female	Sour Orange	Orange Jasmine	0	OJ	right	125
									2015-05-11	14	female	Sour Orange	Orange Jasmine	0	SO	left	53
									2015-05-11	15	female	Sour Orange	Orange Jasmine	0	SO	left	98
									2015-05-11	16	female	Sour Orange	Orange Jasmine	0	SO	right	81
									2015-05-11	17	female	Sour Orange	Orange Jasmine	0	SO	right	73
									2015-05-11	18	female	Sour Orange	Orange Jasmine	0	SO	right	155
									2015-05-11	19	female	Sour Orange	Orange Jasmine	0	OJ	left	169
									2015-05-11	20	female	Sour Orange	Orange Jasmine	0	OJ	left	14
									2015-05-12	1	female	Sour Orange	Orange Jasmine	1	OJ	right	16
									2015-05-12	2	female	Sour Orange	Orange Jasmine	1	SO	left	15
									2015-05-12	3	female	Sour Orange	Orange Jasmine	1	SO	left	136
									2015-05-12	4	female	Sour Orange	Orange Jasmine	1	OJ	right	237
									2015-05-12	5	female	Sour Orange	Orange Jasmine	1	SO	left	106
									2015-05-12	6	female	Sour Orange	Orange Jasmine	1	SO	right	48
									2015-05-12	7	female	Sour Orange	Orange Jasmine	1	SO	right	280
									2015-05-12	8	female	Sour Orange	Orange Jasmine	1	OJ	left	21
									2015-05-12	9	female	Sour Orange	Orange Jasmine	1	OJ	left	144
									2015-05-12	10	female	Sour Orange	Orange Jasmine	1	SO	right	97
									2015-05-12	11	female	Sour Orange	Orange Jasmine	1	SO	left	10
									2015-05-12	12	female	Sour Orange	Orange Jasmine	1	OJ	right	42
									2015-05-12	13	female	Sour Orange	Orange Jasmine	1	SO	left	88
									2015-05-12	14	female	Sour Orange	Orange Jasmine	1	SO	left	146
									2015-05-12	15	female	Sour Orange	Orange Jasmine	1	SO	left	72
									2015-05-12	16	female	Sour Orange	Orange Jasmine	1	OJ	left	260
									2015-05-12	17	female	Sour Orange	Orange Jasmine	1	OJ	left	74
									2015-05-12	18	female	Sour Orange	Orange Jasmine	1	OJ	left	130
									2015-05-12	19	female	Sour Orange	Orange Jasmine	1	OJ	left	16
									2015-05-12	20	female	Sour Orange	Orange Jasmine	1	OJ	left	145
									2015-05-13	1	female	Sour Orange	Orange Jasmine	2	OJ	left	46
									2015-05-13	2	female	Sour Orange	Orange Jasmine	2	SO	right	32
									2015-05-13	3	female	Sour Orange	Orange Jasmine	2	OJ	left	83
									2015-05-13	4	female	Sour Orange	Orange Jasmine	2	OJ	left	83
									2015-05-13	5	female	Sour Orange	Orange Jasmine	2	SO	right	24
									2015-05-13	6	female	Sour Orange	Orange Jasmine	2	OJ	right	168
									2015-05-13	7	female	Sour Orange	Orange Jasmine	2	OJ	right	137
									2015-05-13	8	female	Sour Orange	Orange Jasmine	2	OJ	right	146
									2015-05-13	9	female	Sour Orange	Orange Jasmine	2	SO	left	269
									2015-05-13	10	female	Sour Orange	Orange Jasmine	2	SO	left	108
									2015-05-13	11	female	Sour Orange	Orange Jasmine	2	OJ	left	209
									2015-05-13	12	female	Sour Orange	Orange Jasmine	2	SO	right	44
									2015-05-13	13	female	Sour Orange	Orange Jasmine	2	OJ	left	163
									2015-05-13	14	female	Sour Orange	Orange Jasmine	2	OJ	left	85
									2015-05-13	15	female	Sour Orange	Orange Jasmine	2	OJ	left	102
									2015-05-13	16	female	Sour Orange	Orange Jasmine	2	OJ	right	16
									2015-05-13	17	female	Sour Orange	Orange Jasmine	2	OJ	right	12
									2015-05-13	18	female	Sour Orange	Orange Jasmine	2	SO	left	28
									2015-05-13	19	female	Sour Orange	Orange Jasmine	2	SO	left	231
									2015-05-13	20	female	Sour Orange	Orange Jasmine	2	SO	left	59
									2015-05-14	1	female	Sour Orange	Orange Jasmine	3	OJ	right	194
									2015-05-14	2	female	Sour Orange	Orange Jasmine	3	SO	left	82
									2015-05-14	3	female	Sour Orange	Orange Jasmine	3	SO	left	17
									2015-05-14	4	female	Sour Orange	Orange Jasmine	3	SO	left	29
									2015-05-14	5	female	Sour Orange	Orange Jasmine	3	SO	left	135
									2015-05-14	6	female	Sour Orange	Orange Jasmine	3	OJ	left	19
									2015-05-14	7	female	Sour Orange	Orange Jasmine	3	OJ	left	75
									2015-05-14	8	female	Sour Orange	Orange Jasmine	3	OJ	left	156
									2015-05-14	9	female	Sour Orange	Orange Jasmine	3	OJ	left	220
									2015-05-14	10	female	Sour Orange	Orange Jasmine	3	OJ	left	31
									2015-05-14	11	female	Sour Orange	Orange Jasmine	3	OJ	right	15
									2015-05-14	12	female	Sour Orange	Orange Jasmine	3	SO	left	135
									2015-05-14	13	female	Sour Orange	Orange Jasmine	3	OJ	right	87
									2015-05-14	14	female	Sour Orange	Orange Jasmine	3	OJ	right	133
									2015-05-14	15	female	Sour Orange	Orange Jasmine	3	SO	left	57
									2015-05-14	16	female	Sour Orange	Orange Jasmine	3	OJ	left	42
									2015-05-14	17	female	Sour Orange	Orange Jasmine	3	SO	right	116
									2015-05-14	18	female	Sour Orange	Orange Jasmine	3	OJ	left	20
									2015-05-14	19	female	Sour Orange	Orange Jasmine	3	OJ	left	125
									2015-05-14	20	female	Sour Orange	Orange Jasmine	3	SO	right	100
									2015-05-14	21	female	Sour Orange	Orange Jasmine	3	OJ	left	59
									2015-05-14	22	female	Sour Orange	Orange Jasmine	3	OJ	left	126
									date	trial	sex	host	Treatment	DOT	choice	orientation	time(s)
									2015-05-11	1	female	Sour Orange	Sour Orange	0	OJ	left	78
									2015-05-11	2	female	Sour Orange	Sour Orange	0	OJ	left	125
									2015-05-11	3	female	Sour Orange	Sour Orange	0	SO	right	33
									2015-05-11	4	female	Sour Orange	Sour Orange	0	SO	right	123
									2015-05-11	5	female	Sour Orange	Sour Orange	0	OJ	left	139
									2015-05-11	6	female	Sour Orange	Sour Orange	0	OJ	right	64
									2015-05-11	7	female	Sour Orange	Sour Orange	0	SO	left	14
									2015-05-11	8	female	Sour Orange	Sour Orange	0	SO	left	67
									2015-05-11	9	female	Sour Orange	Sour Orange	0	SO	left	164
									2015-05-11	10	female	Sour Orange	Sour Orange	0	OJ	right	58
									2015-05-11	11	female	Sour Orange	Sour Orange	0	SO	right	18
									2015-05-11	12	female	Sour Orange	Sour Orange	0	SO	right	100
									2015-05-11	13	female	Sour Orange	Sour Orange	0	SO	right	32
									2015-05-11	14	female	Sour Orange	Sour Orange	0	SO	right	57
									2015-05-11	15	female	Sour Orange	Sour Orange	0	OJ	left	72
									2015-05-11	16	female	Sour Orange	Sour Orange	0	SO	left	68
									2015-05-11	17	female	Sour Orange	Sour Orange	0	OJ	right	34
									2015-05-11	18	female	Sour Orange	Sour Orange	0	SO	left	7
									2015-05-11	19	female	Sour Orange	Sour Orange	0	SO	left	107
									2015-05-11	20	female	Sour Orange	Sour Orange	0	OJ	right	129
									2015-05-12	1	female	Sour Orange	Sour Orange	1	OJ	left	234
									2015-05-12	2	female	Sour Orange	Sour Orange	1	SO	right	108
									2015-05-12	3	female	Sour Orange	Sour Orange	1	OJ	left	202
									2015-05-12	4	female	Sour Orange	Sour Orange	1	SO	right	117
									2015-05-12	5	female	Sour Orange	Sour Orange	1	SO	right	60
									2015-05-12	6	female	Sour Orange	Sour Orange	1	OJ	right	80
									2015-05-12	7	female	Sour Orange	Sour Orange	1	SO	left	246
									2015-05-12	8	female	Sour Orange	Sour Orange	1	SO	left	38
									2015-05-12	9	female	Sour Orange	Sour Orange	1	SO	left	140
									2015-05-12	10	female	Sour Orange	Sour Orange	1	SO	left	57
									2015-05-12	11	female	Sour Orange	Sour Orange	1	OJ	left	227
									2015-05-12	12	female	Sour Orange	Sour Orange	1	OJ	right	91
									2015-05-12	13	female	Sour Orange	Sour Orange	1	SO	right	67
									2015-05-12	14	female	Sour Orange	Sour Orange	1	SO	right	177
									2015-05-12	15	female	Sour Orange	Sour Orange	1	SO	right	59
									2015-05-12	16	female	Sour Orange	Sour Orange	1	OJ	left	168
									2015-05-12	17	female	Sour Orange	Sour Orange	1	SO	left	75
									2015-05-12	18	female	Sour Orange	Sour Orange	1	SO	left	50
									2015-05-12	19	female	Sour Orange	Sour Orange	1	SO	left	8
									2015-05-12	20	female	Sour Orange	Sour Orange	1	SO	left	20
									2015-05-13	1	female	sour Orange	Sour Orange	2	SO	right	111
									2015-05-13	2	female	Sour Orange	Sour Orange	2	SO	right	23
									2015-05-13	3	female	sour Orange	Sour Orange	2	OJ	left	40
									2015-05-13	4	female	Sour Orange	Sour Orange	2	OJ	left	134
									2015-05-13	5	female	sour Orange	Sour Orange	2	SO	right	84
									2015-05-13	6	female	Sour Orange	Sour Orange	2	OJ	right	61
									2015-05-13	7	female	sour Orange	Sour Orange	2	SO	left	92
									2015-05-13	8	female	Sour Orange	Sour Orange	2	SO	left	25
									2015-05-13	9	female	sour Orange	Sour Orange	2	SO	left	98
									2015-05-13	10	female	Sour Orange	Sour Orange	2	OJ	right	36
									2015-05-13	11	female	sour Orange	Sour Orange	2	OJ	left	45
									2015-05-13	12	female	Sour Orange	Sour Orange	2	SO	right	12
									2015-05-13	13	female	sour Orange	Sour Orange	2	SO	right	83
									2015-05-13	14	female	Sour Orange	Sour Orange	2	SO	right	275
									2015-05-13	15	female	sour Orange	Sour Orange	2	OJ	left	120
									2015-05-13	16	female	Sour Orange	Sour Orange	2	OJ	right	31
									2015-05-13	17	female	sour Orange	Sour Orange	2	SO	left	75
									2015-05-13	18	female	sour Orange	Sour Orange	2	SO	left	104
									2015-05-13	19	female	Sour Orange	Sour Orange	2	SO	left	20
									2015-05-13	20	female	sour Orange	Sour Orange	2	OJ	right	75
									2015-05-14	1	female	Sour Orange	Sour Orange	3	SO	right	16
									2015-05-14	2	female	Sour Orange	Sour Orange	3	SO	right	100
									2015-05-14	3	female	Sour Orange	Sour Orange	3	SO	right	166
									2015-05-14	4	female	Sour Orange	Sour Orange	3	SO	right	112
									2015-05-14	5	female	Sour Orange	Sour Orange	3	SO	right	202
									2015-05-14	6	female	Sour Orange	Sour Orange	3	OJ	right	243
									2015-05-14	7	female	Sour Orange	Sour Orange	3	OJ	right	144
									2015-05-14	8	female	Sour Orange	Sour Orange	3	SO	left	57
									2015-05-14	9	female	Sour Orange	Sour Orange	3	OJ	right	63
									2015-05-14	10	female	Sour Orange	Sour Orange	3	SO	left	34
									2015-05-14	11	female	Sour Orange	Sour Orange	3	SO	left	199
									2015-05-14	12	female	Sour Orange	Sour Orange	3	OJ	left	125
									2015-05-14	13	female	Sour Orange	Sour Orange	3	SO	right	158
									2015-05-14	14	female	Sour Orange	Sour Orange	3	SO	right	99
									2015-05-14	15	female	Sour Orange	Sour Orange	3	OJ	left	67
									2015-05-14	16	female	Sour Orange	Sour Orange	3	SO	right	30
									2015-05-14	17	female	Sour Orange	Sour Orange	3	SO	left	193
									2015-05-14	18	female	Sour Orange	Sour Orange	3	OJ	right	242
									2015-05-14	19	female	Sour Orange	Sour Orange	3	OJ	right	121
									2015-05-14	20	female	Sour Orange	Sour Orange	3	OJ	right	176
									2015-05-19	1	female	Sour Orange	Sour Orange	0	OJ	left	61
									2015-05-19	2	female	Sour Orange	Sour Orange	0	SO	right	213
									2015-05-19	3	female	Sour Orange	Sour Orange	0	SO	right	16
									2015-05-19	4	female	Sour Orange	Sour Orange	0	OJ	left	50
									2015-05-19	5	female	Sour Orange	Sour Orange	0	SO	right	135
									2015-05-19	6	female	Sour Orange	Sour Orange	0	SO	left	99
									2015-05-19	7	female	Sour Orange	Sour Orange	0	OJ	right	21
									2015-05-19	8	female	Sour Orange	Sour Orange	0	OJ	right	94
									2015-05-19	9	female	Sour Orange	Sour Orange	0	SO	left	75
									2015-05-19	10	female	Sour Orange	Sour Orange	0	SO	left	9
									2015-05-19	11	female	Sour Orange	Sour Orange	0	SO	right	97
									2015-05-19	12	female	Sour Orange	Sour Orange	0	SO	right	74
									2015-05-19	13	female	Sour Orange	Sour Orange	0	SO	right	26
									2015-05-19	14	female	Sour Orange	Sour Orange	0	SO	right	68
									2015-05-19	15	female	Sour Orange	Sour Orange	0	OJ	left	11
									2015-05-19	16	female	Sour Orange	Sour Orange	0	OJ	right	117
									2015-05-19	17	female	Sour Orange	Sour Orange	0	OJ	right	150
									2015-05-19	18	female	Sour Orange	Sour Orange	0	OJ	right	147
									2015-05-19	19	female	Sour Orange	Sour Orange	0	SO	left	65
									2015-05-19	20	female	Sour Orange	Sour Orange	0	SO	left	18
									2015-05-20	1	female	Sour Orange	Sour Orange	1	SO	left	218
									2015-05-20	2	female	Sour Orange	Sour Orange	1	OJ	right	8
									2015-05-20	3	female	Sour Orange	Sour Orange	1	SO	left	21
									2015-05-20	4	female	Sour Orange	Sour Orange	1	OJ	right	29
									2015-05-20	5	female	Sour Orange	Sour Orange	1	SO	left	221
									2015-05-20	6	female	Sour Orange	Sour Orange	1	SO	right	65
									2015-05-20	7	female	Sour Orange	Sour Orange	1	SO	right	22
									2015-05-20	8	female	Sour Orange	Sour Orange	1	OJ	left	70
									2015-05-20	9	female	Sour Orange	Sour Orange	1	SO	right	11
									2015-05-20	10	female	Sour Orange	Sour Orange	1	SO	right	104
									2015-05-20	11	female	Sour Orange	Sour Orange	1	OJ	right	184
									2015-05-20	12	female	Sour Orange	Sour Orange	1	SO	left	49
									2015-05-20	13	female	Sour Orange	Sour Orange	1	OJ	right	137
									2015-05-20	14	female	Sour Orange	Sour Orange	1	SO	left	278
									2015-05-20	15	female	Sour Orange	Sour Orange	1	SO	left	211
									2015-05-20	16	female	Sour Orange	Sour Orange	1	SO	right	30
									2015-05-20	17	female	Sour Orange	Sour Orange	1	SO	right	14
									2015-05-20	18	female	Sour Orange	Sour Orange	1	OJ	left	165
									2015-05-20	19	female	Sour Orange	Sour Orange	1	OJ	left	36
									2015-05-20	20	female	Sour Orange	Sour Orange	1	SO	right	146
									2015-05-21	1	female	Sour Orange	Sour Orange	2	OJ	left	285
									2015-05-21	2	female	Sour Orange	Sour Orange	2	OJ	left	86
									2015-05-21	3	female	Sour Orange	Sour Orange	2	SO	right	87
									2015-05-21	4	female	Sour Orange	Sour Orange	2	SO	right	34
									2015-05-21	5	female	Sour Orange	Sour Orange	2	SO	right	9
									2015-05-21	6	female	Sour Orange	Sour Orange	2	OJ	right	20
									2015-05-21	7	female	Sour Orange	Sour Orange	2	SO	left	108
									2015-05-21	8	female	Sour Orange	Sour Orange	2	SO	left	48
									2015-05-21	9	female	Sour Orange	Sour Orange	2	SO	left	69
									2015-05-21	10	female	Sour Orange	Sour Orange	2	OJ	right	299
									2015-05-21	11	female	Sour Orange	Sour Orange	2	SO	right	67
									2015-05-21	12	female	Sour Orange	Sour Orange	2	SO	right	50
									2015-05-21	13	female	Sour Orange	Sour Orange	2	SO	right	75
									2015-05-21	14	female	Sour Orange	Sour Orange	2	SO	right	125
									2015-05-21	15	female	Sour Orange	Sour Orange	2	SO	right	95
									2015-05-21	16	female	Sour Orange	Sour Orange	2	OJ	right	82
									2015-05-21	17	female	Sour Orange	Sour Orange	2	SO	left	120
									2015-05-21	18	female	Sour Orange	Sour Orange	2	SO	left	20
									2015-05-22	1	female	Sour Orange	Sour Orange	3	OJ	left	44
									2015-05-22	2	female	Sour Orange	Sour Orange	3	OJ	left	284
									2015-05-22	3	female	Sour Orange	Sour Orange	3	SO	right	271
									2015-05-22	4	female	Sour Orange	Sour Orange	3	SO	right	110
									2015-05-22	5	female	Sour Orange	Sour Orange	3	OJ	left	68
									2015-05-22	6	female	Sour Orange	Sour Orange	3	SO	left	36
									2015-05-22	7	female	Sour Orange	Sour Orange	3	SO	left	19
									2015-05-22	8	female	Sour Orange	Sour Orange	3	SO	left	63
									2015-05-22	9	female	Sour Orange	Sour Orange	3	SO	left	18
									2015-05-22	10	female	Sour Orange	Sour Orange	3	OJ	right	99
									2015-05-22	11	female	Sour Orange	Sour Orange	3	SO	right	147
									2015-05-22	12	female	Sour Orange	Sour Orange	3	OJ	left	49
									2015-05-22	13	female	Sour Orange	Sour Orange	3	SO	right	46
									2015-05-22	14	female	Sour Orange	Sour Orange	3	OJ	left	227
									2015-05-22	15	female	Sour Orange	Sour Orange	3	SO	right	13
									2015-05-22	16	female	Sour Orange	Sour Orange	3	SO	left	9
									2015-05-22	17	female	Sour Orange	Sour Orange	3	SO	left	50
									2015-05-22	18	female	Sour Orange	Sour Orange	3	SO	left	14
									2015-05-22	19	female	Sour Orange	Sour Orange	3	OJ	right	204

## Sheet: exp 2 - simple conditioning
Olfactory Learning								Visual Learning
date	rep	sex	treatment	choice	orientation	time		date	rep	sex	treatment	choice	orientation	time
2014-07-03	1	female	experienced	blank	left	95		2015-03-04	1	male	experienced	blue	left	9
2014-07-03	2	female	naive	vanillin	right	126		2015-03-04	2	male	experienced	blue	left	49
2014-07-03	3	male	experienced	blank	left	158		2015-03-04	3	male	experienced	white	right	21
2014-07-03	4	male	experienced	vanillin	right	180		2015-03-04	4	male	experienced	white	right	134
2014-07-03	5	male	naive	blank	left	186		2015-03-04	5	male	experienced	white	right	15
2014-07-03	6	female	experienced	vanillin	right	87		2015-03-04	6	female	experienced	blue	left	170
2014-07-03	7	female	naive	NA	NA	NA		2015-03-04	7	female	experienced	blue	left	94
2014-07-03	8	male	experienced	NA	NA	NA		2015-03-04	8	female	experienced	white	right	34
2014-07-03	9	male	naive	blank	left	44		2015-03-04	9	female	experienced	blue	left	102
2014-07-03	10	female	experienced	vanillin	right	187		2015-03-04	10	female	experienced	blue	left	132
2014-07-03	11	female	naive	blank	left	174		2015-03-04	11	male	experienced	white	right	10
2014-07-03	12	male	experienced	vanillin	left	31		2015-03-04	12	male	experienced	white	right	106
2014-07-03	13	male	naive	blank	right	41		2015-03-04	13	male	experienced	white	right	25
2014-07-03	14	female	experienced	blank	right	17		2015-03-04	14	male	experienced	blue	left	22
2014-07-03	15	female	naive	blank	right	263		2015-03-04	15	male	experienced	blue	left	24
2014-07-03	16	male	experienced	blank	right	39		2015-03-04	16	female	experienced	white	right	19
2014-07-03	17	male	naive	vanillin	left	238		2015-03-04	17	female	experienced	white	right	56
2014-07-03	18	female	experienced	blank	right	165		2015-03-04	18	female	experienced	white	right	53
2014-07-03	19	female	naive	blank	right	199		2015-03-04	19	female	experienced	blue	left	35
2014-07-03	20	male	experienced	vanillin	left	187		2015-03-04	20	female	experienced	white	right	99
2014-07-03	21	male	naive	NA	NA	NA		2015-03-05	1	male	experienced	blue	left	167
2014-07-03	22	female	experienced	vanillin	left	198		2015-03-05	2	male	experienced	blue	left	28
2014-07-03	23	female	naive	blank	right	266		2015-03-05	3	male	experienced	white	right	17
2014-07-03	24	male	experienced	vanillin	left	107		2015-03-05	4	male	experienced	white	right	12
2014-07-03	25	male	naive	vanillin	left	27		2015-03-05	5	male	experienced	white	right	19
2014-07-03	26	female	experienced	blank	right	92		2015-03-05	6	female	experienced	blue	left	12
2014-07-03	27	female	naive	blank	right	117		2015-03-05	7	female	experienced	blue	left	8
2014-07-03	28	male	experienced	blank	right	202		2015-03-05	8	female	experienced	blue	left	10
2014-07-03	29	male	naive	vanillin	left	233		2015-03-05	9	female	experienced	blue	left	32
2014-07-03	30	female	experienced	vanillin	left	70		2015-03-05	10	female	experienced	blue	left	30
2014-07-03	31	female	naive	vanillin	left	26		2015-03-05	11	male	experienced	blue	left	20
2014-07-03	32	female	experienced	vanillin	right	199		2015-03-05	12	male	experienced	white	right	12
2014-07-03	33	female	naive	blank	left	137		2015-03-05	13	male	experienced	white	right	62
2014-07-03	34	male	experienced	vanillin	right	75		2015-03-05	14	male	experienced	blue	left	195
2014-07-03	35	male	naive	vanillin	right	194		2015-03-05	15	male	experienced	blue	left	57
2014-07-03	36	female	experienced	vanillin	right	294		2015-03-05	16	female	experienced	blue	left	40
2014-07-03	37	female	naive	vanillin	right	200		2015-03-05	17	female	experienced	blue	left	250
2014-07-03	38	male	experienced	NA	NA	NA		2015-03-05	18	female	experienced	blue	left	28
2014-07-03	39	male	naive	blank	left	31		2015-03-05	19	female	experienced	white	right	87
2014-07-03	40	female	experienced	vanillin	right	44		2015-03-05	20	female	experienced	white	right	46
2014-07-03	41	female	experienced	blank	left	39		2015-03-05	21	male	experienced	blue	right	7
2014-07-03	42	male	experienced	vanillin	right	126		2015-03-05	22	male	experienced	white	left	30
2014-07-03	43	male	naive	vanillin	right	122		2015-03-05	23	male	experienced	white	left	31
2014-07-03	44	female	experienced	vanillin	right	18		2015-03-05	24	male	experienced	white	left	23
2014-07-03	45	female	experienced	vanillin	right	17		2015-03-05	25	male	experienced	blue	right	25
2014-07-03	46	female	experienced	blank	left	111		2015-03-05	26	female	experienced	blue	left	42
2014-07-03	47	female	experienced	NA	NA	NA		2015-03-05	27	female	experienced	blue	right	76
2014-07-03	48	female	experienced	vanillin	right	74		2015-03-05	28	female	experienced	white	left	60
2014-07-07	1	male	experienced	vanillin	right	57		2015-03-05	29	female	experienced	white	left	200
2014-07-07	2	male	experienced	vanillin	right	17		2015-03-05	30	female	experienced	white	left	23
2014-07-07	3	female	experienced	vanillin	right	76		2015-03-05	31	male	experienced	white	left	67
2014-07-07	4	female	experienced	vanillin	right	44		2015-03-05	32	male	experienced	blue	right	22
2014-07-07	5	male	naive	blank	left	37		2015-03-05	33	male	experienced	blue	right	6
2014-07-07	6	male	naive	blank	left	120		2015-03-05	34	male	experienced	white	left	13
2014-07-07	7	female	naive	blank	left	122		2015-03-05	35	male	experienced	white	left	67
2014-07-07	8	female	naive	blank	right	70		2015-03-05	36	female	experienced	white	left	62
2014-07-07	9	male	experienced	NA	NA	NA		2015-03-05	37	female	experienced	white	left	78
2014-07-07	10	male	experienced	vanillin	left	180		2015-03-05	38	female	experienced	blue	right	53
2014-07-07	11	female	experienced	blank	right	190		2015-03-05	39	female	experienced	blue	right	34
2014-07-07	12	female	experienced	vanillin	left	104		2015-03-05	40	female	experienced	blue	right	21
2014-07-07	13	male	naive	vanillin	left	298		2015-03-13	1	male	experienced	blue	right	129
2014-07-07	14	male	naive	vanillin	left	131		2015-03-13	2	male	experienced	blue	right	17
2014-07-07	15	female	naive	blank	right	159		2015-03-13	3	male	experienced	blue	right	92
2014-07-07	16	female	naive	blank	right	44		2015-03-13	4	male	experienced	white	left	20
2014-07-07	17	male	experienced	blank	right	86		2015-03-13	5	male	experienced	blue	right	47
2014-07-07	18	male	experienced	blank	right	103		2015-03-13	6	female	experienced	white	left	28
2014-07-07	19	female	experienced	NA	NA	NA		2015-03-13	7	female	experienced	blue	right	11
2014-07-07	20	female	experienced	blank	right	126		2015-03-13	8	female	experienced	white	left	8
2014-07-07	21	male	naive	vanillin	left	34		2015-03-13	9	female	experienced	blue	right	18
2014-07-07	22	male	naive	blank	right	96		2015-03-13	10	female	experienced	white	left	65
2014-07-07	23	female	naive	blank	left	83		2015-03-13	11	male	experienced	white	left	22
2014-07-07	24	female	naive	blank	left	66		2015-03-13	12	male	experienced	blue	right	36
2014-07-07	25	male	experienced	NA	NA	NA		2015-03-13	13	male	experienced	white	left	9
2014-07-07	26	male	experienced	vanillin	right	47		2015-03-13	14	male	experienced	white	left	10
2014-07-07	27	female	experienced	vanillin	right	141		2015-03-13	15	male	experienced	white	left	12
2014-07-07	28	female	experienced	blank	left	24		2015-03-13	16	female	experienced	blue	right	39
2014-07-07	29	male	naive	vanillin	right	150		2015-03-13	17	female	experienced	blue	right	16
2014-07-07	30	male	naive	vanillin	right	92		2015-03-13	18	female	experienced	white	left	41
2014-07-07	31	female	naive	blank	left	162		2015-03-13	19	female	experienced	white	left	41
2014-07-07	32	female	naive	blank	left	53		2015-03-02	1	male	naïve	white	right	173
2014-07-07	33	male	experienced	blank	right	204		2015-03-02	2	male	naïve	white	right	106
2014-07-07	34	male	experienced	NA	NA	NA		2015-03-02	3	male	naïve	white	right	21
2014-07-07	35	male	experienced	vanillin	left	56		2015-03-02	4	male	naïve	blue	left	15
2014-07-07	36	male	experienced	vanillin	left	129		2015-03-02	5	male	naïve	white	right	82
2014-07-07	37	male	experienced	NA	NA	NA		2015-03-02	6	male	naïve	white	right	29
2014-07-07	38	male	experienced	vanillin	left	80		2015-03-02	7	female	naïve	white	right	36
2014-07-07	39	male	experienced	NA	NA	NA		2015-03-02	8	female	naïve	white	right	254
2014-07-07	40	male	experienced	blank	right	59		2015-03-02	9	female	naïve	blue	left	143
2014-07-07	41	female	experienced	vanillin	left	233		2015-03-02	10	female	naïve	blue	left	80
2014-07-07	42	female	experienced	blank	right	191		2015-03-02	11	female	naïve	white	right	21
2014-07-07	43	female	experienced	blank	right	201		2015-03-02	12	female	naïve	white	right	30
2014-07-07	44	female	experienced	vanillin	left	77		2015-03-02	13	male	naïve	white	right	16
2014-07-07	45	female	experienced	vanillin	left	116		2015-03-02	14	male	naïve	white	right	151
2014-07-07	46	female	experienced	blank	right	55		2015-03-02	15	male	naïve	blue	left	14
2014-07-07	47	female	experienced	blank	right	256		2015-03-02	16	male	naïve	white	right	52
2014-07-07	48	female	experienced	vanillin	left	42		2015-03-02	17	male	naïve	blue	left	181
2014-07-07	49	male	naive	blank	right	131		2015-03-02	18	female	naïve	white	right	264
2014-07-07	50	male	naive	blank	right	162		2015-03-02	19	female	naïve	blue	left	110
2014-07-07	51	male	naive	vanillin	left	47		2015-03-02	20	female	naïve	blue	left	27
2014-07-07	52	male	naive	vanillin	left	16		2015-03-02	21	female	naïve	blue	left	46
2014-07-07	53	male	naive	blank	right	75		2015-03-02	22	female	naïve	white	right	41
2014-07-07	54	male	naive	vanillin	left	123		2014-06-10	1	male	naïve	white	right	16
2014-07-07	55	male	naive	blank	right	101		2014-06-10	2	male	naïve	white	right	29
2014-07-07	56	male	naive	blank	right	17		2014-06-10	3	male	naïve	NA	NA	NA
2014-07-07	57	female	naive	blank	right	237		2014-06-10	4	male	naïve	NA	NA	NA
2014-07-07	58	female	naive	vanillin	left	95		2014-06-10	5	male	naïve	blue	left	21
2014-07-07	59	female	naive	blank	right	46		2014-06-10	6	male	naïve	white	right	230
2014-07-07	60	female	naive	vanillin	left	53		2014-06-10	7	male	naïve	white	right	254
2014-07-07	61	female	naive	blank	right	21		2014-06-10	8	male	naïve	white	right	192
2014-07-07	62	female	naive	vanillin	left	48		2014-06-10	9	male	naïve	NA	NA	NA
2014-07-11	1	male	experienced	vanillin	left	24		2014-06-10	10	male	naïve	white	right	137
2014-07-11	2	male	naive	vanillin	left	283		2014-06-10	11	female	naïve	white	right	223
2014-07-11	3	male	experienced	NA	NA	NA		2014-06-10	12	female	naïve	white	right	209
2014-07-11	4	male	naive	blank	right	46		2014-06-10	13	female	naïve	white	right	16
2014-07-11	5	male	experienced	vanillin	left	27		2014-06-10	14	female	naïve	white	right	89
2014-07-11	6	male	naive	vanillin	left	221		2014-06-10	15	female	naïve	white	right	70
2014-07-11	7	male	experienced	vanillin	left	146		2014-06-10	16	female	naïve	NA	NA	NA
2014-07-11	8	male	naive	NA	NA	NA		2014-06-16	1	male	naïve	white	right	19
2014-07-11	9	male	experienced	blank	left	120		2014-06-16	2	male	naïve	NA	NA	NA
2014-07-11	10	male	naive	vanillin	right	62		2014-06-16	3	male	naïve	blue	left	49
2014-07-11	11	male	experienced	vanillin	left	28		2014-06-16	4	male	naïve	white	right	199
2014-07-11	12	male	naive	blank	right	92		2014-06-16	5	male	naïve	white	right	238
2014-07-11	13	male	experienced	vanillin		136		2014-06-16	6	male	naïve	NA	NA	NA
2014-07-11	14	male	naive	NA	NA	NA		2014-06-16	7	male	naïve	white	right	199
2014-07-11	15	male	experienced	vanillin	right	54		2014-06-16	8	male	naïve	white	left	39
2014-07-11	16	male	naive	blank	left	123		2014-06-16	9	male	naïve	blue	right	127
2014-07-11	17	male	experienced	vanillin	right	209		2014-06-16	10	male	naïve	white	left	33
2014-07-11	18	male	naive	vanillin	right	138		2014-06-16	11	male	naïve	white	left	21
2014-07-11	19	male	experienced	NA	NA	NA		2014-06-16	12	male	naïve	blue	right	113
2014-07-11	20	male	naive	vanillin	right	145		2014-06-16	13	male	naïve	white	left	116
2014-07-11	21	male	experienced	vanillin	right	289		2014-06-16	14	male	naïve	blue	right	138
2014-07-11	22	male	naive	blank	left	92		2014-06-16	15	male	naïve	white	left	202
2014-07-11	23	male	experienced	vanillin	left	67		2014-06-16	16	female	naïve	white	left	34
2014-07-11	24	male	naive	blank	right	73		2014-06-16	17	female	naïve	white	left	17
2014-07-11	25	male	experienced	vanillin	left	186		2014-06-16	18	female	naïve	white	left	106
2014-07-11	26	male	experienced	blank	right	99		2014-06-16	19	female	naïve	blue	right	18
2014-07-11	27	male	experienced	vanillin	left	71		2014-06-16	20	female	naïve	white	left	215
2014-07-11	28	male	experienced	blank	right	90		2014-06-16	21	female	naïve	blue	right	64
2014-07-11	29	female	experienced	vanillin	left	233		2014-06-16	22	female	naïve	white	right	54
2014-07-11	30	female	naive	vanillin	left	229		2014-06-16	23	female	naïve	white	right	209
2014-07-11	31	female	experienced	vanillin	left	9		2014-06-16	24	female	naïve	white	right	75
2014-07-11	32	female	naive	vanillin	left	45		2014-06-16	25	female	naïve	blue	left	73
2014-07-11	33	female	experienced	NA	NA	NA		2014-06-16	26	female	naïve	NA	NA	NA
2014-07-11	34	female	naive	vanillin	left	14		2014-06-16	27	female	naïve	white	right	38
2014-07-11	35	female	naive	blank	right	93		2014-06-16	28	female	naïve	white	right	20
2014-07-11	36	female	naive	blank	right	231		2014-06-16	29	female	naïve	white	right	34
2014-07-11	37	female	naive	NA	NA	NA		2014-06-16	30	female	naïve	NA	NA	NA
2014-07-11	38	female	naive	blank	right	159		2014-06-16	31	female	naïve	NA	NA	NA
2014-07-11	39	female	naive	vanillin	right	248		2014-06-16	32	female	naïve	white	right	87
2014-07-11	40	female	naive	vanillin	right	128		2014-06-16	33	female	naïve	white	right	70
2014-07-11	41	female	experienced	vanillin	right	73		2014-06-16	34	female	naïve	white	right	165
2014-07-11	42	female	naive	blank	left	115		2014-06-17	1	male	naïve	blue	left	36
2014-07-11	43	female	experienced	blank	left	16		2014-06-17	2	male	naïve	white	right	259
2014-07-11	44	female	naive	vanillin	right	170		2014-06-17	3	male	naïve	white	right	28
2014-07-11	45	female	experienced	blank	left	103		2014-06-17	4	male	naïve	white	right	50
2014-07-11	46	female	naive	blank	left	63		2014-06-17	5	male	naïve	white	right	72
2014-07-11	47	female	experienced	vanillin	right	257		2014-06-17	6	male	naïve	white	right	176
2014-07-11	48	female	naive	vanillin	right	58		2014-06-17	7	male	naïve	white	left	39
2014-07-11	49	female	naive	vanillin	left	57		2014-06-17	8	male	naïve	white	left	114
2014-07-11	50	female	naive	NA	NA	NA		2014-06-17	9	male	naïve	white	left	55
2014-07-11	51	female	naive	blank	right	54		2014-06-17	10	male	naïve	white	left	11
2014-07-11	52	female	naive	blank	right	95		2014-06-17	11	female	naïve	white	left	78
2014-07-11	53	female	naive	blank	right	110		2014-06-17	12	female	naïve	white	left	10
2014-07-11	54	female	naive	blank	right	196		2014-06-17	13	female	naïve	NA	NA	NA
2014-07-11	55	female	experienced	vanillin	left	127		2014-06-17	14	female	naïve	white	left	140
								2014-06-17	15	female	naïve	white	right	26
								2014-06-17	16	female	naïve	white	right	51
								2014-06-17	17	female	naïve	white	right	68
								2014-06-17	18	female	naïve	blue	left	38
								2014-06-17	19	female	naïve	white	right	35
								2014-06-17	20	female	naïve	white	right	17
								2014-06-17	21	female	naïve	white	right	69

## Sheet: exp 3 - compound conditioning
date	time of day	rep	sex	treatment	choice	orientation	time(s)
2014-08-11	am	1	male	experienced	bvan	right	15
2014-08-11	am	2	male	naïve	white	left	21
2014-08-11	am	3	male	experienced	white	left	95
2014-08-11	am	4	male	naïve	white	right	114
2014-08-11	am	5	male	experienced	bvan	right	13
2014-08-11	am	6	male	naïve	bvan	right	208
2014-08-11	am	7	male	experienced	bvan	left	89
2014-08-11	am	8	male	naïve	white	left	33
2014-08-11	am	9	male	experienced	white	left	17
2014-08-11	am	10	male	naïve	white	right	144
2014-08-11	am	11	male	experienced	bvan	left	7
2014-08-11	am	12	male	naïve	bvan	right	51
2014-08-11	am	13	male	experienced	white	right	73
2014-08-11	am	14	male	naïve	white	right	48
2014-08-11	am	15	male	experienced	white	right	49
2014-08-11	am	16	male	naïve	white	right	89
2014-08-11	am	17	female	experienced	white	right	268
2014-08-11	am	18	female	naïve	white	right	78
2014-08-11	am	19	female	experienced	bvan	left	7
2014-08-11	am	20	female	naïve	white	right	185
2014-08-11	am	21	female	experienced	white	right	50
2014-08-11	am	22	female	naïve	white	left	89
2014-08-11	am	23	female	experienced	bvan	right	73
2014-08-11	am	24	female	naïve	bvan	right	75
2014-08-11	am	25	female	experienced	white	left	81
2014-08-11	am	26	female	naïve	white	left	98
2014-08-11	am	27	female	experienced	bvan	right	204
2014-08-11	am	28	female	naïve	white	left	125
2014-08-11	am	29	female	experienced	bvan	right	6
2014-08-11	am	30	female	naïve	bvan	right	155
2014-08-11	am	31	female	experienced	white	left	47
2014-08-11	am	32	female	naïve	white	left	63
2014-08-11	am	33	female	experienced	white	left	166
2014-08-11	am	34	female	naïve	nonresponding	nonresponding	nonresponding
2014-08-11	am	35	female	experienced	white	left	32
2014-08-11	am	36	female	naïve	white	left	154
2014-08-13	pm	1	female	experienced	white	left	24
2014-08-13	pm	2	female	naïve	white	left	190
2014-08-13	pm	3	female	experienced	bvan	right	62
2014-08-13	pm	4	female	naïve	white	left	50
2014-08-13	pm	5	female	experienced	white	left	183
2014-08-13	pm	6	female	naïve	nonresponding	nonresponding	nonresponding
2014-08-13	pm	7	female	experienced	bvan	right	103
2014-08-13	pm	8	female	naïve	white	left	17
2014-08-13	pm	9	female	experienced	white	left	96
2014-08-13	pm	10	female	naïve	white	left	132
2014-08-13	pm	11	female	experienced	white	left	105
2014-08-13	pm	12	female	naïve	white	left	96
2014-08-13	pm	13	female	experienced	white	left	53
2014-08-13	pm	14	female	naïve	white	left	82
2014-08-13	pm	15	female	experienced	bvan	right	282
2014-08-13	pm	16	female	naïve	white	left	67
2014-08-13	pm	17	male	experienced	bvan	right	32
2014-08-13	pm	18	male	naïve	white	left	198
2014-08-13	pm	19	male	experienced	bvan	right	51
2014-08-13	pm	20	male	naïve	bvan	right	227
2014-08-13	pm	21	male	experienced	white	left	67
2014-08-13	pm	22	male	naïve	white	left	83
2014-08-13	pm	23	male	experienced	white	left	88
2014-08-13	pm	24	male	naïve	bvan	right	104
2014-08-13	pm	25	male	experienced	white	left	52
2014-08-13	pm	26	male	naïve	white	left	65
2014-08-13	pm	27	male	experienced	bvan	right	49
2014-08-13	pm	28	male	naïve	white	left	52
2014-08-13	pm	29	male	experienced	bvan	right	45
2014-08-13	pm	30	male	naïve	bvan	right	101
2014-08-13	pm	31	male	experienced	white	left	144
2014-08-13	pm	32	male	naïve	bvan	left	175
2014-08-19	am	1	male	experienced	white	left	264
2014-08-19	am	2	male	naïve	bvan	right	209
2014-08-19	am	3	male	experienced	bvan	right	65
2014-08-19	am	4	male	naïve	white	left	8
2014-08-19	am	5	male	experienced	bvan	right	116
2014-08-19	am	6	male	naïve	white	left	182
2014-08-19	am	7	male	experienced	bvan	right	64
2014-08-19	am	8	male	naïve	white	left	206
2014-08-19	am	9	male	experienced	bvan	left	83
2014-08-19	am	10	male	naïve	white	right	33
2014-08-19	am	11	male	experienced	bvan	left	143
2014-08-19	am	12	male	naïve	bvan	left	63
2014-08-19	am	13	male	experienced	bvan	left	6
2014-08-19	am	14	male	naïve	bvan	left	75
2014-08-19	am	15	male	experienced	white	right	66
2014-08-19	am	16	male	naïve	white	right	47
2014-08-19	am	17	female	experienced	bvan	left	71
2014-08-19	am	18	female	naïve	bvan	left	143
2014-08-19	am	19	female	experienced	white	right	50
2014-08-19	am	20	female	naïve	bvan	left	53
2014-08-19	am	21	female	experienced	white	right	65
2014-08-19	am	22	female	naïve	bvan	left	191
2014-08-19	am	23	female	experienced	white	right	226
2014-08-19	am	24	female	naïve	bvan	left	253
2014-08-19	am	25	female	experienced	white	left	163
2014-08-19	am	26	female	naïve	white	left	212
2014-08-19	am	27	female	experienced	white	left	181
2014-08-19	am	28	female	naïve	white	left	144
2014-08-19	am	29	female	experienced	bvan	right	167
2014-08-19	am	30	female	naïve	white	left	121
2014-08-19	am	31	female	experienced	bvan	right	166
2014-08-19	am	32	female	naïve	bvan	right	16
2014-08-21	pm	1	male	naïve	bvan	right	18
2014-08-21	pm	2	male	naïve	bvan	right	165
2014-08-21	pm	3	male	naïve	white	left	80
2014-08-21	pm	4	male	naïve	bvan	right	268
2014-08-21	pm	5	male	naïve	white	left	22
2014-08-21	pm	6	female	naïve	white	left	108
2014-08-21	pm	7	female	naïve	bvan	right	156
2014-08-21	pm	8	female	naïve	bvan	right	87
2014-08-21	pm	9	female	naïve	bvan	right	248
2014-08-21	pm	10	female	naïve	white	left	179
2014-08-21	pm	11	male	naïve	white	right	78
2014-08-21	pm	12	male	naïve	bvan	left	79
2014-08-21	pm	13	male	naïve	white	right	145
2014-08-21	pm	14	male	naïve	bvan	left	110
2014-08-21	pm	15	male	naïve	white	right	283
2014-08-21	pm	16	female	naïve	white	right	182
2014-08-21	pm	17	female	naïve	white	right	65
2014-08-21	pm	18	female	naïve	white	right	158
2014-08-21	pm	19	female	naïve	bvan	left	202
2014-08-21	pm	20	female	naïve	white	right	71
2014-08-21	pm	21	male	experienced	white	right	18
2014-08-21	pm	22	male	experienced	white	right	32
2014-08-21	pm	23	male	experienced	white	right	91
2014-08-21	pm	24	male	experienced	white	right	91
2014-08-22	pm	25	male	experienced	white	right	37
2014-08-21	pm	26	female	experienced	white	right	97
2014-08-21	pm	27	female	experienced	white	right	128
2014-08-21	pm	28	female	experienced	bvan	left	254
2014-08-21	pm	29	female	experienced	white	right	99
2014-08-21	pm	30	female	experienced	white	right	147
2014-08-21	pm	31	male	experienced	white	left	66
2014-08-21	pm	32	male	experienced	white	left	118
2014-08-21	pm	33	male	experienced	bvan	right	26
2014-08-21	pm	34	male	experienced	white	left	72
2014-08-21	pm	35	male	experienced	white	left	60
2014-08-21	pm	36	female	experienced	bvan	right	74
2014-08-21	pm	37	female	experienced	white	left	79
2014-08-21	pm	38	female	experienced	bvan	right	95
2014-08-21	pm	39	female	experienced	white	left	39
2014-08-21	pm	40	female	experienced	bvan	right	221
2014-08-25	pm	1	male	naïve	white	right	6
2014-08-25	pm	2	male	naïve	white	right	7
2014-08-25	pm	3	male	naïve	bvan	left	90
2014-08-25	pm	4	male	naïve	white	right	31
2014-08-25	pm	5	male	naïve	white	right	79
2014-08-25	pm	6	male	naïve	bvan	left	63
2014-08-25	pm	7	female	naïve	white	right	152
2014-08-25	pm	8	female	naïve	white	right	258
2014-08-25	pm	9	female	naïve	white	right	32
2014-08-25	pm	10	female	naïve	white	right	268
2014-08-25	pm	11	female	naïve	white	right	198
2014-08-25	pm	12	female	naïve	white	right	140
2014-08-25	pm	13	male	naïve	bvan	right	133
2014-08-25	pm	14	male	naïve	white	left	233
2014-08-25	pm	15	male	naïve	bvan	right	136
2014-08-25	pm	16	male	naïve	white	left	39
2014-08-25	pm	17	male	naïve	bvan	right	44
2014-08-25	pm	18	male	naïve	white	left	72
2014-08-25	pm	19	female	naïve	bvan	right	81
2014-08-25	pm	20	female	naïve	white	left	21
2014-08-25	pm	21	female	naïve	white	left	47
2014-08-25	pm	22	female	naïve	white	left	76
2014-08-25	pm	23	female	naïve	bvan	right	114
2014-08-25	pm	24	female	naïve	white	left	146
2014-08-25	pm	25	male	naïve	white	right	12
2014-08-25	pm	26	male	naïve	white	right	36
2014-08-25	pm	27	male	naïve	white	right	16
2014-08-25	pm	28	female	naïve	white	right	24
2014-08-25	pm	29	female	naïve	white	right	87
2014-08-25	pm	30	female	naïve	white	right	23
2014-08-25	pm	31	female	naïve	white	right	17
2014-08-25	pm	32	female	naïve	white	right	96
2014-08-25	pm	33	female	naïve	white	right	147
2014-08-27	pm	1	male	experienced	white	left	92
2014-08-27	pm	2	male	experienced	white	left	14
2014-08-27	pm	3	male	experienced	white	left	39
2014-08-27	pm	4	male	experienced	white	left	54
2014-08-27	pm	5	male	experienced	white	left	55
2014-08-27	pm	6	male	experienced	white	left	42
2014-08-27	pm	7	male	experienced	white	left	98
2014-08-27	pm	8	female	experienced	white	left	100
2014-08-27	pm	9	female	experienced	white	left	87
2014-08-27	pm	10	female	experienced	bvan	right	23
2014-08-27	pm	11	female	experienced	white	left	68
2014-08-27	pm	12	female	experienced	bvan	right	55
2014-08-27	pm	13	female	experienced	bvan	right	90
2014-08-27	pm	14	female	experienced	bvan	right	212
2014-08-27	pm	15	male	experienced	bvan	left	10
2014-08-27	pm	16	male	experienced	white	right	21
2014-08-27	pm	17	male	experienced	white	right	90
2014-08-27	pm	18	male	experienced	white	right	61
2014-08-27	pm	19	male	experienced	bvan	left	12
2014-08-27	pm	20	male	experienced	white	right	102
2014-08-27	pm	21	male	experienced	white	right	77
2014-08-27	pm	22	male	experienced	bvan	left	128
2014-08-27	pm	23	female	experienced	white	right	114
2014-08-27	pm	24	female	experienced	bvan	left	41
2014-08-27	pm	25	female	experienced	white	right	32
2014-08-27	pm	26	female	experienced	bvan	left	50
2014-08-27	pm	27	female	experienced	white	right	19
2014-08-27	pm	28	female	experienced	white	right	37
2014-08-27	pm	29	female	experienced	white	right	282
2014-08-27	pm	30	female	experienced	bvan	left	8
2014-08-27	pm	31	female	experienced	white	right	97
2014-08-11	pm	1	male	experienced	blue	right	19
2014-08-11	pm	2	male	naïve	blue	right	106
2014-08-11	pm	3	male	experienced	blue	right	129
2014-08-11	pm	4	male	naïve	white	left	46
2014-08-11	pm	5	male	experienced	white	left	152
2014-08-11	pm	6	male	naïve	white	left	32
2014-08-11	pm	7	male	experienced	blue	right	16
2014-08-11	pm	8	male	naïve	white	left	244
2014-08-11	pm	9	male	experienced	white	right	31
2014-08-11	pm	10	male	naïve	white	right	66
2014-08-11	pm	11	male	experienced	white	right	9
2014-08-11	pm	12	male	naïve	white	right	16
2014-08-11	pm	13	male	experienced	blue	left	56
2014-08-11	pm	14	male	naïve	white	right	165
2014-08-11	pm	15	male	experienced	white	right	134
2014-08-11	pm	16	male	naïve	white	right	16
2014-08-11	pm	17	male	experienced	white	right	102
2014-08-11	pm	18	male	naïve	white	right	48
2014-08-11	pm	19	female	experienced	nonresponding	nonresponding	nonresponding
2014-08-11	pm	20	female	naïve	white	right	165
2014-08-11	pm	21	female	experienced	white	right	125
2014-08-11	pm	22	female	naïve	blue	left	82
2014-08-11	pm	23	female	experienced	white	right	93
2014-08-11	pm	24	female	naïve	white	right	127
2014-08-11	pm	25	female	experienced	white	right	30
2014-08-11	pm	26	female	naïve	white	right	129
2014-08-11	pm	27	female	experienced	white	left	27
2014-08-11	pm	28	female	naïve	white	left	189
2014-08-11	pm	29	female	experienced	white	left	41
2014-08-11	pm	30	female	naïve	blue	right	10
2014-08-11	pm	31	female	experienced	blue	right	65
2014-08-11	pm	32	female	naïve	white	left	60
2014-08-11	pm	33	female	experienced	white	left	80
2014-08-11	pm	34	female	naïve	blue	right	88
2014-08-11	pm	35	female	experienced	blue	right	148
2014-08-11	pm	36	female	naïve	white	left	78
2014-08-13	am	1	female	experienced	blue	right	142
2014-08-13	am	2	female	naïve	white	left	163
2014-08-13	am	3	female	experienced	white	left	173
2014-08-13	am	4	female	naïve	white	left	80
2014-08-13	am	5	female	experienced	blue	right	22
2014-08-13	am	6	female	naïve	white	left	138
2014-08-13	am	7	female	experienced	blue	right	181
2014-08-13	am	8	female	naïve	nonresponding	nonresponding	nonresponding
2014-08-13	am	9	female	experienced	nonresponding	nonresponding	nonresponding
2014-08-13	am	10	female	naïve	blue	right	132
2014-08-13	am	11	female	experienced	white	left	105
2014-08-13	am	12	female	naïve	white	left	146
2014-08-13	am	13	female	experienced	blue	right	75
2014-08-13	am	14	female	naïve	white	left	138
2014-08-13	am	15	female	experienced	blue	left	221
2014-08-13	am	16	female	naïve	white	right	184
2014-08-13	am	17	female	experienced	blue	left	260
2014-08-13	am	18	female	naïve	white	right	31
2014-08-13	am	19	female	experienced	white	right	57
2014-08-13	am	20	female	naïve	white	right	70
2014-08-13	am	21	female	experienced	blue	left	243
2014-08-13	am	22	female	naïve	white	right	35
2014-08-13	am	23	male	experienced	white	right	218
2014-08-13	am	24	male	naïve	white	right	270
2014-08-13	am	25	male	experienced	white	right	145
2014-08-13	am	26	male	naïve	white	right	243
2014-08-13	am	27	male	experienced	white	right	263
2014-08-13	am	28	male	naïve	blue	left	203
2014-08-13	am	29	male	experienced	white	left	76
2014-08-13	am	30	male	naïve	white	left	47
2014-08-13	am	31	male	experienced	white	left	272
2014-08-13	am	32	male	naïve	white	left	92
2014-08-13	am	33	male	experienced	white	left	272
2014-08-13	am	34	male	naïve	blue	right	36
2014-08-13	am	35	male	experienced	white	left	71
2014-08-13	am	36	male	naïve	white	left	72
2014-08-13	am	37	male	experienced	blue	right	49
2014-08-13	am	38	male	naïve	blue	right	91
2014-08-13	am	39	male	experienced	white	left	45
2014-08-13	am	40	male	naïve	white	left	68
2014-08-13	am	41	male	experienced	white	left	75
2014-08-13	am	42	male	naïve	white	left	43
2014-08-19	pm	1	male	experienced	blue	right	93
2014-08-19	pm	2	male	naïve	white	left	17
2014-08-19	pm	3	male	experienced	blue	right	259
2014-08-19	pm	4	male	naïve	white	left	197
2014-08-19	pm	5	male	experienced	blue	right	26
2014-08-19	pm	6	male	naïve	white	left	145
2014-08-19	pm	7	male	experienced	white	left	78
2014-08-19	pm	8	male	naïve	blue	right	19
2014-08-19	pm	9	male	experienced	blue	right	20
2014-08-19	pm	10	male	naïve	white	left	154
2014-08-19	pm	11	male	experienced	white	left	48
2014-08-19	pm	12	male	naïve	blue	right	30
2014-08-19	pm	13	male	experienced	blue	right	74
2014-08-19	pm	14	male	naïve	white	left	79
2014-08-19	pm	15	male	experienced	white	left	107
2014-08-19	pm	16	male	naïve	blue	right	94
2014-08-19	pm	17	female	experienced	white	left	92
2014-08-19	pm	18	female	naïve	white	left	290
2014-08-19	pm	19	female	experienced	white	left	23
2014-08-19	pm	20	female	naïve	white	left	171
2014-08-19	pm	21	female	experienced	white	left	99
2014-08-19	pm	22	female	naïve	white	left	200
2014-08-19	pm	23	female	experienced	white	left	255
2014-08-19	pm	24	female	naïve	blue	right	193
2014-08-19	pm	25	female	experienced	blue	right	84
2014-08-19	pm	26	female	naïve	white	left	248
2014-08-19	pm	27	female	experienced	blue	right	163
2014-08-19	pm	28	female	naïve	blue	right	100
2014-08-19	pm	29	female	experienced	blue	right	142
2014-08-19	pm	30	female	naïve	white	left	296
2014-08-19	pm	31	female	experienced	white	left	214
2014-08-19	pm	32	female	naïve	white	left	128
2014-08-21	am	1	male	naïve	white	left	204
2014-08-21	am	2	male	naïve	blue	right	68
2014-08-21	am	3	male	naïve	blue	right	60
2014-08-21	am	4	male	naïve	blue	right	67
2014-08-21	am	5	male	naïve	white	left	20
2014-08-21	am	6	female	naïve	white	left	76
2014-08-21	am	7	female	naïve	white	left	259
2014-08-21	am	8	female	naïve	white	left	123
2014-08-21	am	9	female	naïve	white	left	127
2014-08-21	am	10	female	naïve	white	left	186
2014-08-21	am	11	male	naïve	blue	right	143
2014-08-21	am	12	male	naïve	white	right	10
2014-08-21	am	13	male	naïve	white	right	18
2014-08-21	am	14	male	naïve	blue	left	219
2014-08-21	am	15	male	naïve	white	right	49
2014-08-21	am	16	female	naïve	nonresponding	nonresponding	nonresponding
2014-08-21	am	17	female	naïve	blue	left	27
2014-08-21	am	18	female	naïve	white	right	192
2014-08-21	am	19	female	naïve	white	right	131
2014-08-21	am	20	female	naïve	white	right	20
2014-08-21	am	21	female	naïve	white	right	195
2014-08-21	am	22	male	experienced	white	right	70
2014-08-21	am	23	male	experienced	blue	left	174
2014-08-21	am	24	male	experienced	blue	left	78
2014-08-21	am	25	male	experienced	blue	left	9
2014-08-21	am	26	female	experienced	white	right	70
2014-08-21	am	27	female	experienced	white	right	131
2014-08-21	am	28	female	experienced	blue	left	101
2014-08-21	am	29	female	experienced	blue	left	56
2014-08-21	am	30	female	experienced	blue	left	203
2014-08-21	am	31	female	experienced	blue	left	106
2014-08-21	am	32	male	experienced	white	left	219
2014-08-21	am	33	male	experienced	blue	right	27
2014-08-21	am	34	male	experienced	blue	right	20
2014-08-21	am	35	male	experienced	white	left	109
2014-08-21	am	36	male	experienced	white	left	21
2014-08-21	am	37	male	experienced	blue	right	93
2014-08-21	am	38	male	experienced	white	left	42
2014-08-21	am	39	female	experienced	white	left	92
2014-08-21	am	40	female	experienced	blue	right	138
2014-08-21	am	41	female	experienced	white	left	89
2014-08-21	am	42	female	experienced	white	left	103
2014-08-21	am	43	female	experienced	blue	right	75
2014-08-22	am	1	male	naïve	blue	right	39
2014-08-22	am	2	male	naïve	blue	right	87
2014-08-22	am	3	male	naïve	blue	right	45
2014-08-22	am	4	male	naïve	white	left	86
2014-08-22	am	5	male	naïve	white	left	191
2014-08-22	am	6	female	naïve	blue	right	136
2014-08-22	am	7	female	naïve	white	left	221
2014-08-22	am	8	female	naïve	white	left	220
2014-08-22	am	9	female	naïve	white	left	161
2014-08-22	am	10	female	naïve	white	left	110
2014-08-22	am	11	male	naïve	blue	right	224
2014-08-22	am	12	male	naïve	blue	right	102
2014-08-22	am	13	male	naïve	white	left	18
2014-08-22	am	14	male	naïve	white	left	158
2014-08-22	am	15	male	naïve	blue	right	34
2014-08-22	am	16	female	naïve	blue	left	179
2014-08-22	am	17	female	naïve	white	right	194
2014-08-22	am	18	female	naïve	nonresponding	nonresponding	nonresponding
2014-08-22	am	19	female	naïve	white	right	242
2014-08-22	am	20	female	naïve	blue	left	41
2014-08-22	am	21	male	naïve	white	right	38
2014-08-22	am	22	male	naïve	white	right	95
2014-08-22	am	23	male	naïve	blue	left	245
2014-08-22	am	24	male	naïve	white	right	204
2014-08-22	am	25	male	naïve	white	right	58
2014-08-22	am	26	female	naïve	white	right	111
2014-08-22	am	27	female	naïve	white	right	123
2014-08-22	am	28	female	naïve	white	right	170
2014-08-22	am	29	female	naïve	white	right	86
2014-08-22	am	30	female	naïve	white	right	171
2014-08-28	pm	1	male	experienced	white	right	15
2014-08-28	pm	2	male	experienced	white	right	34
2014-08-28	pm	3	male	experienced	white	right	12
2014-08-28	pm	4	male	experienced	blue	left	88
2014-08-28	pm	5	male	experienced	blue	left	30
2014-08-28	pm	6	male	experienced	white	right	42
2014-08-28	pm	7	male	experienced	blue	left	115
2014-08-28	pm	8	female	experienced	white	right	99
2014-08-28	pm	9	female	experienced	blue	left	57
2014-08-28	pm	10	female	experienced	white	left	92
2014-08-28	pm	11	female	experienced	white	right	111
2014-08-28	pm	12	female	experienced	white	right	37
2014-08-28	pm	13	female	experienced	blue	left	142
2014-08-28	pm	14	female	experienced	blue	left	9
2014-08-28	pm	15	female	experienced	white	right	45
2014-08-28	pm	16	male	experienced	blue	right	134
2014-08-28	pm	17	male	experienced	white	left	91
2014-08-28	pm	18	male	experienced	blue	right	50
2014-08-28	pm	19	male	experienced	blue	right	53
2014-08-28	pm	20	male	experienced	white	left	12
2014-08-28	pm	21	male	experienced	white	left	88
2014-08-28	pm	22	male	experienced	blue	right	41
2014-08-28	pm	23	male	experienced	white	left	67
2014-08-28	pm	24	female	experienced	white	left	77
2014-08-28	pm	25	female	experienced	white	left	36
2014-08-28	pm	26	female	experienced	white	left	130
2014-08-28	pm	27	female	experienced	blue	right	137
2014-08-28	pm	28	female	experienced	blue	right	12
2014-08-28	pm	29	female	experienced	white	left	60
2014-08-28	pm	30	female	experienced	white	left	198
2014-08-28	pm	31	female	experienced	nonresponding	nonresponding	nonresponding
2014-08-12	am	1	male	experienced	blank	left	140
2014-08-12	am	2	male	naïve	vanillin	right	43
2014-08-12	am	3	male	experienced	nonresponding	nonresponding	nonresponding
2014-08-12	am	4	male	naïve	blank	left	186
2014-08-12	am	5	male	experienced	blank	left	78
2014-08-12	am	6	male	naïve	blank	left	25
2014-08-12	am	7	male	experienced	blank	left	48
2014-08-12	am	8	male	naïve	vanillin	right	108
2014-08-12	am	9	male	experienced	blank	left	48
2014-08-12	am	10	male	naïve	nonresponding	nonresponding	nonresponding
2014-08-12	am	11	male	experienced	vanillin	left	93
2014-08-12	am	12	male	naïve	blank	right	96
2014-08-12	am	13	male	experienced	blank	right	93
2014-08-12	am	14	male	naïve	vanillin	left	274
2014-08-12	am	15	male	experienced	blank	right	35
2014-08-12	am	16	male	naïve	blank	right	7
2014-08-12	am	17	male	experienced	blank	right	176
2014-08-12	am	18	male	naïve	vanillin	left	131
2014-08-12	am	19	male	experienced	blank	right	70
2014-08-12	am	20	male	naïve	blank	right	88
2014-08-12	am	21	female	experienced	vanillin	left	170
2014-08-12	am	22	female	naïve	blank	right	206
2014-08-12	am	23	female	experienced	blank	right	119
2014-08-12	am	24	female	naïve	vanillin	left	210
2014-08-12	am	25	female	experienced	blank	right	114
2014-08-12	am	26	female	naïve	nonresponding	nonresponding	nonresponding
2014-08-12	am	27	female	experienced	vanillin	left	169
2014-08-12	am	28	female	naïve	blank	right	212
2014-08-12	am	29	female	experienced	vanillin	left	66
2014-08-12	am	30	female	naïve	vanillin	left	279
2014-08-12	am	31	female	experienced	vanillin	right	202
2014-08-12	am	32	female	naïve	vanillin	right	244
2014-08-12	am	33	female	experienced	vanillin	right	146
2014-08-12	am	34	female	naïve	vanillin	right	55
2014-08-12	am	35	female	experienced	vanillin	right	287
2014-08-12	am	36	female	naïve	vanillin	right	132
2014-08-12	am	37	female	experienced	vanillin	right	174
2014-08-12	am	38	female	naïve	blank	left	193
2014-08-12	am	39	female	experienced	blank	left	103
2014-08-12	am	40	female	naïve	nonresponding	nonresponding	nonresponding
2014-08-12	am	41	female	experienced	nonresponding	nonresponding	nonresponding
2014-08-12	am	42	female	naïve	blank	left	223
2014-08-14	pm	1	female	experienced	vanillin	left	95
2014-08-14	pm	2	female	naïve	blank	right	90
2014-08-14	pm	3	female	experienced	vanillin	left	177
2014-08-14	pm	4	female	naïve	vanillin	left	122
2014-08-14	pm	5	female	experienced	vanillin	left	157
2014-08-14	pm	6	female	naïve	blank	right	48
2014-08-14	pm	7	female	experienced	vanillin	left	148
2014-08-14	pm	8	female	naïve	blank	right	83
2014-08-14	pm	9	female	experienced	vanillin	right	63
2014-08-14	pm	10	female	naïve	vanillin	right	180
2014-08-14	pm	11	female	experienced	blank	left	116
2014-08-14	pm	12	female	naïve	blank	left	175
2014-08-14	pm	13	female	experienced	vanillin	right	45
2014-08-14	pm	14	female	naïve	vanillin	right	228
2014-08-14	pm	15	female	experienced	blank	left	88
2014-08-14	pm	16	female	naïve	blank	left	167
2014-08-14	pm	17	female	experienced	vanillin	right	118
2014-08-14	pm	18	male	experienced	vanillin	right	165
2014-08-14	pm	19	male	naïve	blank	left	135
2014-08-14	pm	20	male	experienced	vanillin	right	100
2014-08-14	pm	21	male	naïve	vanillin	right	54
2014-08-14	pm	22	male	experienced	vanillin	right	44
2014-08-14	pm	23	male	naïve	vanillin	right	88
2014-08-14	pm	24	male	experienced	blank	left	38
2014-08-14	pm	25	male	naïve	blank	left	187
2014-08-14	pm	26	male	experienced	vanillin	left	29
2014-08-14	pm	27	male	naïve	vanillin	left	154
2014-08-14	pm	28	male	experienced	vanillin	left	87
2014-08-14	pm	29	male	naïve	vanillin	left	43
2014-08-14	pm	30	male	experienced	vanillin	left	43
2014-08-14	pm	31	male	naïve	blank	right	228
2014-08-14	pm	32	male	experienced	vanillin	left	153
2014-08-14	pm	33	male	naïve	vanillin	left	107
2014-08-18	am	1	male	experienced	blank	right	11
2014-08-18	am	2	male	naïve	nonresponding	nonresponding	nonresponding
2014-08-18	am	3	male	experienced	vanillin	left	172
2014-08-18	am	4	male	naïve	blank	right	29
2014-08-18	am	5	male	experienced	blank	right	128
2014-08-18	am	6	male	naïve	blank	right	232
2014-08-18	am	7	male	experienced	vanillin	left	48
2014-08-18	am	8	male	naïve	vanillin	left	241
2014-08-18	am	9	male	experienced	vanillin	right	95
2014-08-18	am	10	male	naïve	vanillin	right	161
2014-08-18	am	11	male	experienced	vanillin	right	34
2014-08-18	am	12	male	naïve	blank	left	47
2014-08-18	am	13	male	experienced	blank	left	227
2014-08-18	am	14	male	naïve	blank	left	119
2014-08-18	am	15	male	experienced	vanillin	right	153
2014-08-18	am	16	male	naïve	blank	left	66
2014-08-18	am	17	female	experienced	blank	left	134
2014-08-18	am	18	female	naïve	vanillin	right	212
2014-08-18	am	19	female	experienced	vanillin	right	163
2014-08-18	am	20	female	naïve	vanillin	right	106
2014-08-18	am	21	female	experienced	vanillin	right	231
2014-08-18	am	22	female	naïve	blank	left	255
2014-08-18	am	23	female	experienced	blank	left	283
2014-08-18	am	24	female	naïve	blank	left	144
2014-08-18	am	25	female	experienced	blank	right	163
2014-08-18	am	26	female	naïve	blank	right	37
2014-08-18	am	27	female	experienced	vanillin	left	183
2014-08-18	am	28	female	naïve	blank	right	120
2014-08-18	am	29	female	experienced	vanillin	left	297
2014-08-18	am	30	female	naïve	blank	right	99
2014-08-18	am	31	female	experienced	blank	right	87
2014-08-18	am	32	female	naïve	blank	right	93
2014-08-18	am	33	male	naïve	vanillin	left	159
2014-08-18	am	34	female	naïve	nonresponding	nonresponding	nonresponding
2014-08-20	pm	1	male	experienced	vanillin	left	42
2014-08-20	pm	2	male	experienced	vanillin	left	31
2014-08-20	pm	3	male	experienced	blank	right	178
2014-08-20	pm	4	male	experienced	blank	right	42
2014-08-20	pm	5	male	experienced	blank	right	105
2014-08-20	pm	6	female	experienced	vanillin	left	158
2014-08-20	pm	7	female	experienced	vanillin	left	265
2014-08-20	pm	8	female	experienced	blank	right	36
2014-08-20	pm	9	female	experienced	vanillin	left	28
2014-08-20	pm	10	female	experienced	nonresponding	nonresponding	nonresponding
2014-08-20	pm	11	male	experienced	vanillin	right	129
2014-08-20	pm	12	male	experienced	blank	left	30
2014-08-20	pm	13	male	experienced	blank	left	133
2014-08-20	pm	14	male	experienced	vanillin	right	74
2014-08-20	pm	15	male	experienced	blank	left	98
2014-08-20	pm	16	female	experienced	blank	left	97
2014-08-20	pm	17	female	experienced	blank	left	139
2014-08-20	pm	18	female	experienced	vanillin	right	58
2014-08-20	pm	19	female	experienced	blank	left	286
2014-08-20	pm	20	female	experienced	blank	left	82
2014-08-20	pm	21	male	naïve	vanillin	right	156
2014-08-20	pm	22	male	naïve	blank	left	42
2014-08-20	pm	23	male	naïve	blank	left	76
2014-08-20	pm	24	male	naïve	blank	left	77
2014-08-20	pm	25	male	naïve	blank	left	139
2014-08-20	pm	26	female	naïve	blank	left	85
2014-08-20	pm	27	female	naïve	blank	left	152
2014-08-20	pm	28	female	naïve	nonresponding	nonresponding	nonresponding
2014-08-20	pm	29	female	naïve	vanillin	right	192
2014-08-20	pm	30	female	naïve	blank	left	129
2014-08-20	pm	31	male	naïve	vanillin	left	104
2014-08-20	pm	32	male	naïve	vanillin	left	57
2014-08-20	pm	33	male	naïve	blank	right	52
2014-08-20	pm	34	female	naïve	blank	right	76
2014-08-20	pm	35	female	naïve	vanillin	left	92
2014-08-20	pm	36	female	naïve	nonresponding	nonresponding	nonresponding
2014-08-20	pm	37	female	naïve	vanillin	left	97
2014-08-26	pm	1	male	naïve	vanillin	left	66
2014-08-26	pm	2	male	naïve	blank	right	29
2014-08-26	pm	3	male	naïve	vanillin	left	75
2014-08-26	pm	4	male	naïve	blank	right	27
2014-08-26	pm	5	male	naïve	blank	right	124
2014-08-26	pm	6	male	naïve	blank	right	112
2014-08-26	pm	7	female	naïve	vanillin	left	73
2014-08-26	pm	8	female	naïve	blank	right	116
2014-08-26	pm	9	female	naïve	blank	right	120
2014-08-26	pm	10	female	naïve	blank	right	67
2014-08-26	pm	11	female	naïve	vanillin	left	225
2014-08-26	pm	12	female	naïve	blank	right	10
2014-08-26	pm	13	male	naïve	vanillin	right	134
2014-08-26	pm	14	male	naïve	blank	left	205
2014-08-26	pm	15	male	naïve	blank	left	92
2014-08-26	pm	16	male	naïve	blank	left	130
2014-08-26	pm	17	male	naïve	vanillin	right	65
2014-08-26	pm	18	male	naïve	blank	left	191
2014-08-26	pm	19	female	naïve	blank	left	60
2014-08-26	pm	20	female	naïve	blank	left	102
2014-08-26	pm	21	female	naïve	vanillin	right	131
2014-08-26	pm	22	female	naïve	vanillin	right	206
2014-08-26	pm	23	female	naïve	vanillin	right	114
2014-08-26	pm	24	female	naïve	vanillin	right	123
2014-08-26	pm	25	male	naïve	vanillin	right	17
2014-08-26	pm	26	male	naïve	blank	left	27
2014-08-26	pm	27	male	naïve	vanillin	right	78
2014-08-26	pm	28	female	naïve	vanillin	left	107
2014-08-26	pm	29	female	naïve	blank	right	83
2014-08-26	pm	30	female	naïve	vanillin	right	37
2014-08-27	am	1	male	experienced	blank	right	177
2014-08-27	am	2	male	experienced	vanillin	left	130
2014-08-27	am	3	male	experienced	vanillin	left	116
2014-08-27	am	4	male	experienced	blank	left	168
2014-08-27	am	5	male	experienced	blank	right	159
2014-08-27	am	6	male	experienced	blank	right	78
2014-08-27	am	7	male	experienced	blank	left	91
2014-08-27	am	8	male	experienced	vanillin	left	208
2014-08-27	am	9	female	experienced	vanillin	left	58
2014-08-27	am	10	female	experienced	blank	right	91
2014-08-27	am	11	female	experienced	blank	right	148
2014-08-27	am	12	female	experienced	vanillin	left	69
2014-08-27	am	13	male	experienced	blank	left	106
2014-08-27	am	14	male	experienced	vanillin	right	41
2014-08-27	am	15	male	experienced	blank	left	110
2014-08-27	am	16	female	experienced	vanillin	right	113
2014-08-27	am	17	female	experienced	vanillin	right	164
2014-08-27	am	18	female	experienced	blank	left	42
2014-08-27	am	19	female	experienced	blank	left	100
2014-08-27	am	20	female	experienced	vanillin	right	169
2014-08-27	am	21	female	experienced	vanillin	right	156
2014-08-27	am	22	female	experienced	blank	left	181
2014-08-27	am	23	male	experienced	blank	right	46
2014-08-27	am	24	male	experienced	blank	right	187
2014-08-27	am	25	male	experienced	blank	right	43
2014-08-27	am	26	male	experienced	blank	right	92
2014-08-27	am	27	female	experienced	vanillin	left	16
2014-08-27	am	28	female	experienced	vanillin	left	16
2014-08-27	am	29	female	experienced	vanillin	left	245
2014-08-27	am	30	female	experienced	vanillin	left	156
2014-08-27	am	31	female	experienced	vanillin	left	49
2014-08-27	am	32	female	experienced	vanillin	left	87
2014-08-27	am	33	male	experienced	nonresponding	nonresponding	nonresponding
2014-08-27	am	34	male	experienced	nonresponding	nonresponding	nonresponding
2014-08-27	am	35	male	experienced	nonresponding	nonresponding	nonresponding
2014-08-12	pm	1	male	experienced	blue	right	27
2014-08-12	pm	3	male	experienced	vanillin	left	98
2014-08-12	pm	5	male	experienced	vanillin	left	27
2014-08-12	pm	7	male	experienced	blue	right	154
2014-08-12	pm	9	male	experienced	vanillin	left	70
2014-08-12	pm	11	male	experienced	blue	right	109
2014-08-12	pm	13	male	experienced	vanillin	left	138
2014-08-12	pm	15	male	experienced	vanillin	left	46
2014-08-12	pm	17	male	experienced	blue	right	56
2014-08-12	pm	19	female	experienced	blue	right	171
2014-08-12	pm	21	female	experienced	vanillin	left	69
2014-08-12	pm	23	female	experienced	blue	right	103
2014-08-12	pm	25	female	experienced	vanillin	left	14
2014-08-12	pm	27	female	experienced	vanillin	left	161
2014-08-12	pm	29	female	experienced	vanillin	left	72
2014-08-12	pm	31	female	experienced	vanillin	left	260
2014-08-12	pm	33	female	experienced	vanillin	left	112
2015-05-26	am	1	male	naïve	vanillin	left	45
2015-05-26	am	2	male	naïve	vanillin	left	182
2015-05-26	am	3	male	naïve	blue	right	85
2015-05-26	am	4	male	naïve	vanillin	left	254
2015-05-26	am	5	male	naïve	vanillin	left	128
2015-05-26	am	6	female	naïve	vanillin	left	90
2015-05-26	am	7	female	naïve	vanillin	left	221
2015-05-26	am	8	female	naïve	vanillin	left	64
2015-05-26	am	9	female	naïve	vanillin	left	174
2015-05-26	am	10	female	naïve	vanillin	left	116
2015-05-26	am	11	male	naïve	vanillin	left	37
2015-05-26	am	12	male	naïve	vanillin	left	16
2015-05-26	am	13	male	naïve	blue	right	275
2015-05-26	am	14	male	naïve	vanillin	left	86
2015-05-26	am	15	male	naïve	vanillin	left	153
2015-05-26	am	16	female	naïve	vanillin	left	95
2015-05-26	am	17	female	naïve	vanillin	left	140
2015-05-26	am	18	female	naïve	vanillin	left	124
2015-05-26	am	19	female	naïve	vanillin	left	189
2015-05-26	am	20	female	naïve	vanillin	left	126
2014-08-14	am	1	female	experienced	vanillin	left	26
2014-08-14	am	2	female	naïve	vanillin	left	28
2014-08-14	am	3	female	experienced	vanillin	left	101
2014-08-14	am	4	female	naïve	vanillin	left	51
2014-08-14	am	5	female	experienced	vanillin	left	33
2014-08-14	am	6	female	naïve	blue	right	86
2014-08-14	am	7	female	experienced	vanillin	left	34
2014-08-14	am	8	female	naïve	blue	right	35
2014-08-14	am	9	female	experienced	blue	right	127
2014-08-14	am	10	female	naïve	vanillin	right	64
2014-08-14	am	11	female	experienced	vanillin	right	18
2014-08-14	am	12	female	naïve	vanillin	right	126
2014-08-14	am	13	female	experienced	blue	left	174
2014-08-14	am	14	female	naïve	blue	left	259
2014-08-14	am	15	female	experienced	vanillin	right	16
2014-08-14	am	16	female	naïve	vanillin	right	137
2014-08-14	am	17	male	experienced	vanillin	right	60
2014-08-14	am	18	male	naïve	vanillin	right	159
2014-08-14	am	19	male	experienced	vanillin	right	35
2014-08-14	am	20	male	naïve	blue	left	125
2014-08-14	am	21	male	experienced	blue	left	64
2014-08-14	am	22	male	naïve	blue	left	72
2014-08-14	am	23	male	experienced	vanillin	right	67
2014-08-14	am	24	male	naïve	vanillin	right	12
2014-08-14	am	25	male	experienced	blue	left	165
2014-08-14	am	26	male	naïve	vanillin	right	45
2014-08-14	am	27	male	experienced	vanillin	left	21
2014-08-14	am	28	male	naïve	blue	right	68
2014-08-14	am	29	male	experienced	blue	right	70
2014-08-14	am	30	male	naïve	blue	right	20
2014-08-14	am	31	male	experienced	vanillin	left	19
2014-08-14	am	32	male	naïve	vanillin	left	31
2014-08-18	pm	1	male	experienced	vanillin	left	112
2014-08-18	pm	2	male	naïve	blue	right	141
2014-08-18	pm	3	male	experienced	vanillin	left	25
2014-08-18	pm	4	male	naïve	vanillin	left	107
2014-08-18	pm	5	male	experienced	blue	right	136
2014-08-18	pm	6	male	naïve	blue	right	13
2014-08-18	pm	7	male	experienced	vanillin	left	34
2014-08-18	pm	8	male	naïve	blue	right	162
2014-08-18	pm	9	male	experienced	blue	right	89
2014-08-18	pm	10	male	naïve	blue	right	173
2014-08-18	pm	11	male	experienced	blue	right	91
2014-08-18	pm	12	male	naïve	blue	right	109
2014-08-18	pm	13	male	experienced	blue	right	64
2014-08-18	pm	14	male	naïve	vanillin	left	25
2014-08-18	pm	15	male	experienced	vanillin	left	123
2014-08-18	pm	16	male	naïve	vanillin	left	135
2014-08-18	pm	17	female	experienced	blue	right	216
2014-08-18	pm	18	female	naïve	vanillin	left	45
2014-08-18	pm	19	female	experienced	blue	right	252
2014-08-18	pm	20	female	naïve	blue	right	127
2014-08-18	pm	21	female	experienced	vanillin	left	130
2014-08-18	pm	22	female	naïve	blue	right	237
2014-08-18	pm	23	female	experienced	blue	right	227
2014-08-18	pm	24	female	naïve	blue	right	117
2014-08-18	pm	25	female	experienced	vanillin	left	78
2014-08-18	pm	26	female	naïve	blue	right	38
2014-08-18	pm	27	female	experienced	blue	right	72
2014-08-18	pm	28	female	naïve	blue	right	256
2014-08-18	pm	29	female	experienced	vanillin	left	224
2014-08-18	pm	30	female	naïve	vanillin	left	89
2014-08-18	pm	31	female	experienced	blue	right	152
2014-08-18	pm	32	female	naïve	vanillin	left	260
2014-08-20	am	1	female	experienced	vanillin	left	10
2014-08-20	am	2	female	naïve	blue	right	12
2014-08-20	am	3	female	experienced	vanillin	left	30
2014-08-20	am	4	female	naïve	vanillin	left	76
2014-08-20	am	5	female	experienced	blue	right	33
2014-08-20	am	6	female	naïve	blue	right	163
2014-08-20	am	7	female	experienced	vanillin	left	62
2014-08-20	am	8	female	naïve	vanillin	left	83
2014-08-20	am	9	female	experienced	blue	right	129
2014-08-20	am	10	female	naïve	blue	right	75
2014-08-20	am	11	female	experienced	blue	right	170
2014-08-20	am	12	female	naïve	vanillin	left	85
2014-08-20	am	13	female	experienced	blue	right	150
2014-08-20	am	14	female	naïve	vanillin	left	102
2014-08-20	am	15	female	experienced	vanillin	left	154
2014-08-20	am	16	female	naïve	vanillin	left	188
2014-08-20	am	17	female	experienced	blue	right	150
2014-08-20	am	18	female	naïve	blue	right	189
2014-08-20	am	19	male	experienced	vanillin	left	12
2014-08-20	am	20	male	naïve	blue	right	26
2014-08-20	am	21	male	experienced	blue	right	70
2014-08-20	am	22	male	naïve	vanillin	left	97
2014-08-20	am	23	male	experienced	vanillin	left	68
2014-08-20	am	24	male	naïve	blue	right	143
2014-08-20	am	25	male	experienced	blue	right	218
2014-08-20	am	26	male	naïve	blue	right	166
2014-08-20	am	27	male	experienced	vanillin	left	32
2014-08-20	am	28	male	naïve	vanillin	left	68
2014-08-20	am	29	male	experienced	blue	right	118
2014-08-20	am	30	male	naïve	blue	right	182
2014-08-20	am	31	male	experienced	vanillin	left	49
2014-08-20	am	32	male	naïve	vanillin	left	129
2014-08-20	am	33	male	experienced	blue	right	96
2014-08-20	am	34	male	naïve	vanillin	left	71
2014-08-20	am	1	male	naïve	vanillin	left	232
2014-08-20	am	2	male	naïve	blue	right	72
2014-08-20	am	3	male	naïve	vanillin	left	29
2014-08-20	am	4	male	naïve	vanillin	left	41
2014-08-20	am	5	male	naïve	vanillin	left	84
2014-08-20	am	6	male	naïve	vanillin	left	58
2014-08-20	am	7	male	naïve	vanillin	left	91
2014-08-20	am	8	male	naïve	vanillin	left	87
2014-08-20	am	9	male	naïve	vanillin	left	132
2014-08-20	am	10	male	naïve	vanillin	left	109
2014-08-20	am	11	female	naïve	vanillin	left	203
2014-08-20	am	12	female	naïve	vanillin	left	122
2014-08-20	am	13	female	naïve	vanillin	left	189
2014-08-20	am	14	female	naïve	vanillin	left	106
2014-08-20	am	15	female	naïve	vanillin	left	105
2014-08-20	am	16	female	naïve	vanillin	left	115
2014-08-20	am	17	female	naïve	blue	right	9
2014-08-20	am	18	female	naïve	vanillin	left	26
2014-08-20	am	19	female	naïve	nonresponding	nonresponding	nonresponding
2014-08-20	am	20	female	naïve	blue	right	62
2014-08-20	am	21	female	naïve	vanillin	left	75
2014-08-28	am	1	male	experienced	vanillin	right	211
2014-08-28	am	2	male	experienced	vanillin	right	10
2014-08-28	am	3	male	experienced	vanillin	right	25
2014-08-28	am	4	male	experienced	vanillin	right	29
2014-08-28	am	5	male	experienced	blue	left	105
2014-08-28	am	6	male	experienced	vanillin	right	139
2014-08-28	am	7	female	experienced	blue	left	123
2014-08-28	am	8	female	experienced	blue	left	64
2014-08-28	am	9	female	experienced	blue	left	123
2014-08-28	am	10	female	experienced	blue	left	98
2014-08-28	am	11	female	experienced	vanillin	right	116
2014-08-28	am	12	female	experienced	blue	left	54
2014-08-28	am	13	female	experienced	blue	left	175
2014-08-28	am	14	female	experienced	blue	left	162
2014-08-28	am	15	male	experienced	blue	right	76
2014-08-28	am	16	male	experienced	blue	right	197
2014-08-28	am	17	male	experienced	blue	right	187
2014-08-28	am	18	male	experienced	vanillin	left	11
2014-08-28	am	19	male	experienced	vanillin	left	76
2014-08-28	am	20	male	experienced	blue	right	147
2014-08-28	am	21	male	experienced	blue	right	198
2014-08-28	am	22	male	experienced	blue	right	126
2014-08-28	am	23	male	experienced	blue	right	17
2014-08-28	am	24	female	experienced	vanillin	left	11
2014-08-28	am	25	female	experienced	vanillin	left	294
2014-08-28	am	26	female	experienced	vanillin	left	174
2014-08-28	am	27	female	experienced	vanillin	left	176
2014-08-28	am	28	female	experienced	blue	right	17
2014-08-28	am	29	female	experienced	vanillin	left	147
2014-08-28	am	30	female	experienced	blue	right	115
2014-08-28	am	31	male	experienced	blue	left	174
2014-08-28	am	32	male	experienced	vanillin	right	26
2014-08-28	am	33	male	experienced	vanillin	right	22
2014-08-28	am	34	male	experienced	blue	left	202
2014-08-28	am	35	male	experienced	vanillin	right	130
2014-08-28	am	36	male	experienced	blue	left	95
2014-08-28	am	37	male	experienced	vanillin	right	113
2014-08-28	am	38	female	experienced	vanillin	right	15
2014-08-28	am	39	female	experienced	blue	left	168
2014-08-28	am	40	female	experienced	blue	left	79
2014-08-28	am	41	female	experienced	vanillin	right	155
2014-08-28	am	42	female	experienced	blue	left	118
2014-08-28	am	43	female	experienced	blue	left	37
2014-08-28	am	44	female	experienced	blue	left	57
2014-09-02	pm	1	male	naïve	compound	left	79
2014-09-02	pm	2	male	naïve	blue	right	29
2014-09-02	pm	3	male	naïve	blue	right	82
2014-09-02	pm	4	male	naïve	compound	left	35
2014-09-02	pm	5	male	naïve	blue	right	18
2014-09-02	pm	6	male	naïve	compound	left	39
2014-09-02	pm	7	male	naïve	blue	right	34
2014-09-02	pm	8	male	naïve	blue	right	36
2014-09-02	pm	9	male	naïve	blue	right	240
2014-09-02	pm	10	male	naïve	blue	right	14
2014-09-02	pm	11	male	naïve	blue	right	154
2014-09-02	pm	12	female	naïve	compound	left	49
2014-09-02	pm	13	female	naïve	compound	left	82
2014-09-02	pm	14	female	naïve	compound	left	131
2014-09-02	pm	15	female	naïve	blue	right	134
2014-09-02	pm	16	female	naïve	compound	right	210
2014-09-02	pm	17	female	naïve	compound	right	8
2014-09-02	pm	18	female	naïve	blue	left	6
2014-09-02	pm	19	female	naïve	blue	left	44
2014-09-02	pm	20	female	naïve	compound	right	86
2014-09-02	pm	21	female	naïve	compound	right	229
2014-09-02	pm	22	female	naïve	nonrepsoncompounding	nonresponding	nonresponding
2014-09-02	pm	23	female	naïve	blue	right	281
2014-09-05	pm	1	male	experienced	compound	right	21
2014-09-05	pm	2	male	experienced	compound	right	199
2014-09-05	pm	3	male	experienced	compound	right	181
2014-09-05	pm	4	male	experienced	blue	left	134
2014-09-05	pm	5	male	experienced	compound	right	131
2014-09-05	pm	6	male	experienced	blue	left	29
2014-09-05	pm	7	male	experienced	compound	right	19
2014-09-05	pm	8	male	experienced	blue	left	33
2014-09-05	pm	9	male	experienced	blue	left	72
2014-09-05	pm	10	male	experienced	blue	left	266
2014-09-05	pm	11	male	experienced	blue	left	195
2014-09-05	pm	12	female	experienced	compound	right	28
2014-09-05	pm	13	female	experienced	compound	right	61
2014-09-05	pm	14	female	experienced	compound	right	240
2014-09-05	pm	15	female	experienced	compound	right	57
2014-09-05	pm	16	female	experienced	compound	right	120
2014-09-05	pm	17	female	experienced	compound	right	171
2014-09-05	pm	18	female	experienced	blue	left	27
2014-09-08	pm	1	male	naïve	compound	right	146
2014-09-08	pm	2	male	naïve	compound	right	57
2014-09-08	pm	3	male	naïve	blue	left	137
2014-09-08	pm	4	male	naïve	blue	left	15
2014-09-08	pm	5	male	naïve	blue	left	26
2014-09-08	pm	6	male	naïve	compound	right	78
2014-09-08	pm	7	female	naïve	blue	left	162
2014-09-08	pm	8	female	naïve	blue	left	6
2014-09-08	pm	9	female	naïve	blue	left	108
2014-09-08	pm	10	female	naïve	blue	left	11
2014-09-08	pm	11	female	naïve	blue	left	49
2014-09-08	pm	12	female	naïve	compound	right	36
2014-09-08	pm	13	male	naïve	compound	left	176
2014-09-08	pm	14	male	naïve	compound	left	67
2014-09-08	pm	15	male	naïve	compound	left	228
2014-09-08	pm	16	male	naïve	compound	left	131
2014-09-08	pm	17	male	naïve	compound	left	67
2014-09-08	pm	18	male	naïve	blue	right	180
2014-09-08	pm	19	female	naïve	compound	left	297
2014-09-08	pm	20	female	naïve	compound	left	50
2014-09-08	pm	21	female	naïve	compound	left	195
2014-09-08	pm	22	female	naïve	blue	right	98
2014-09-08	pm	23	female	naïve	compound	left	222
2014-09-08	pm	24	female	naïve	blue	right	174
2014-09-09	pm	1	male	naïve	compound	left	11
2014-09-09	pm	2	male	naïve	compound	left	209
2014-09-09	pm	3	male	naïve	compound	left	191
2014-09-09	pm	4	male	naïve	blue	right	55
2014-09-09	pm	5	male	naïve	blue	right	19
2014-09-09	pm	6	male	naïve	blue	right	12
2014-09-09	pm	7	male	naïve	compound	left	33
2014-09-09	pm	8	female	naïve	nonrepsoncompounding	nonresponding	nonresponding
2014-09-09	pm	9	female	naïve	blue	right	212
2014-09-09	pm	10	female	naïve	compound	left	12
2014-09-09	pm	11	female	naïve	compound	left	158
2014-09-09	pm	12	female	naïve	compound	left	198
2014-09-09	pm	13	female	naïve	compound	left	154
2014-09-09	pm	14	female	naïve	blue	right	299
2014-09-09	pm	15	female	naïve	blue	right	76
2014-09-09	pm	16	male	naïve	blue	left	221
2014-09-09	pm	17	male	naïve	compound	right	8
2014-09-09	pm	18	male	naïve	compound	right	113
2014-09-09	pm	19	male	naïve	blue	left	14
2014-09-09	pm	20	male	naïve	compound	right	27
2014-09-09	pm	21	male	naïve	blue	left	41
2014-09-09	pm	22	female	naïve	blue	left	91
2014-09-09	pm	23	female	naïve	blue	left	11
2014-09-09	pm	24	female	naïve	blue	left	67
2014-09-09	pm	25	female	naïve	nonrepsoncompounding	nonresponding	nonresponding
2014-09-09	pm	26	female	naïve	compound	right	56
2014-09-09	pm	27	female	naïve	compound	right	247
2014-09-09	pm	28	female	naïve	blue	left	291
2014-09-09	pm	29	female	naïve	compound	right	13
2014-09-09	pm	30	female	naïve	compound	right	97
2014-09-10	pm	1	male	naïve	blue	left	76
2014-09-10	pm	2	male	naïve	compound	right	114
2014-09-10	pm	3	male	naïve	blue	left	114
2014-09-10	pm	4	male	naïve	compound	right	68
2014-09-10	pm	5	male	naïve	blue	left	74
2014-09-10	pm	6	male	naïve	compound	right	15
2014-09-10	pm	7	female	naïve	compound	right	128
2014-09-10	pm	8	female	naïve	compound	right	37
2014-09-10	pm	9	female	naïve	compound	right	251
2014-09-10	pm	10	female	naïve	compound	right	78
2014-09-10	pm	11	female	naïve	blue	left	274
2014-09-10	pm	12	female	naïve	blue	left	50
2014-09-10	pm	13	male	naïve	compound	left	144
2014-09-10	pm	14	male	naïve	compound	left	8
2014-09-10	pm	15	male	naïve	nonrepsoncompounding	nonresponding	nonresponding
2014-09-10	pm	16	male	naïve	blue	right	27
2014-09-10	pm	17	male	naïve	blue	right	44
2014-09-10	pm	18	male	naïve	blue	right	96
2014-09-10	pm	19	female	naïve	blue	right	168
2014-09-10	pm	20	female	naïve	blue	right	48
2014-09-10	pm	21	female	naïve	compound	left	95
2014-09-10	pm	22	female	naïve	blue	right	66
2014-09-10	pm	23	female	naïve	blue	right	19
2014-09-10	pm	24	female	naïve	blue	right	107
2014-09-10	pm	25	male	naïve	compound	right	111
2014-09-10	pm	26	male	naïve	compound	right	45
2014-09-10	pm	27	male	naïve	compound	right	91
2014-09-10	pm	28	female	naïve	blue	left	76
2014-09-10	pm	29	female	naïve	blue	left	61
2014-09-15	pm	1	male	naïve	blue	left	19
2014-09-15	pm	2	male	naïve	blue	left	46
2014-09-15	pm	3	male	naïve	blue	left	36
2014-09-15	pm	4	male	naïve	blue	left	52
2014-09-15	pm	5	male	naïve	compound	right	109
2014-09-15	pm	6	male	naïve	blue	left	31
2014-09-15	pm	7	male	naïve	compound	right	160
2014-09-15	pm	8	male	naïve	compound	right	10
2014-09-15	pm	9	male	naïve	blue	left	14
2014-09-15	pm	10	male	naïve	blue	left	23
2014-09-15	pm	11	female	naïve	compound	right	13
2014-09-15	pm	12	female	naïve	blue	left	146
2014-09-15	pm	13	female	naïve	blue	left	103
2014-09-15	pm	14	female	naïve	blue	left	269
2014-09-15	pm	15	female	naïve	compound	right	212
2014-09-15	pm	16	male	naïve	compound	left	277
2014-09-15	pm	17	male	naïve	compound	left	156
2014-09-15	pm	18	female	naïve	blue	right	294
2014-09-15	pm	19	female	naïve	blue	right	28
2014-09-15	pm	20	female	naïve	compound	left	48
2014-09-15	pm	21	female	naïve	blue	right	236
2014-09-15	pm	22	female	naïve	blue	right	100
2014-09-15	pm	23	male	naïve	blue	right	12
2014-09-15	pm	24	male	naïve	compound	left	13
2014-09-15	pm	25	male	naïve	blue	right	126
2014-09-15	pm	26	female	naïve	compound	left	48
2014-09-15	pm	27	female	naïve	compound	left	46
2014-09-15	pm	28	female	naïve	blue	right	31
2014-09-15	pm	29	female	naïve	compound	left	135
2014-09-15	pm	30	female	naïve	blue	right	214
2014-10-01	pm	1	male	experienced	blue	left	161
2014-10-01	pm	2	male	experienced	compound	right	12
2014-10-01	pm	3	male	experienced	compound	right	6
2014-10-01	pm	4	female	experienced	compound	right	119
2014-10-01	pm	5	female	experienced	compound	right	120
2014-10-01	pm	6	female	experienced	blue	left	234
2014-10-01	pm	7	female	experienced	blue	left	74
2014-10-01	pm	8	female	experienced	compound	right	71
2014-10-01	pm	9	female	experienced	compound	right	189
2014-10-01	pm	10	male	experienced	compound	right	14
2014-10-01	pm	11	male	experienced	blue	left	143
2014-10-01	pm	12	male	experienced	compound	right	50
2014-10-01	pm	13	female	experienced	blue	left	66
2014-10-01	pm	14	female	experienced	compound	right	62
2014-10-01	pm	15	female	experienced	blue	left	59
2014-10-01	pm	16	female	experienced	compound	right	59
2014-10-01	pm	17	female	experienced	blue	left	80
2014-10-01	pm	18	female	experienced	compound	right	50
2014-10-01	pm	19	male	experienced	compound	right	57
2014-10-01	pm	20	male	experienced	blue	left	88
2014-10-01	pm	21	male	experienced	blue	left	154
2014-10-01	pm	22	female	experienced	nonrepsoncompounding	nonresponding	300
2014-10-01	pm	23	female	experienced	blue	left	19
2015-01-16	am	1	male	experienced	blue	right	115
2015-01-16	am	2	male	experienced	blue	right	129
2015-01-16	am	3	male	experienced	compound	left	120
2015-01-16	am	4	male	experienced	compound	left	140
2015-01-16	am	5	male	experienced	blue	right	62
2015-01-16	am	6	male	experienced	blue	right	35
2015-01-16	am	7	female	experienced	compound	left	188
2015-01-16	am	8	female	experienced	compound	left	100
2015-01-16	am	9	female	experienced	compound	left	42
2015-01-16	am	10	female	experienced	blue	right	225
2015-01-16	am	11	female	experienced	compound	left	13
2015-01-16	am	12	female	experienced	compound	left	16
2015-01-16	am	13	male	experienced	compound	left	189
2015-01-16	am	14	male	experienced	compound	left	100
2015-01-16	am	15	male	experienced	compound	left	217
2015-01-16	am	16	male	experienced	blue	right	52
2015-01-16	am	17	male	experienced	blue	right	14
2015-01-16	am	18	male	experienced	blue	right	82
2015-01-16	am	19	female	experienced	blue	right	266
2015-01-16	am	20	female	experienced	blue	right	157
2015-01-16	am	21	female	experienced	compound	left	49
2015-01-16	am	22	female	experienced	compound	left	74
2015-01-16	am	23	female	experienced	compound	left	71
2015-01-16	am	24	female	experienced	compound	left	139
2015-01-16	am	25	male	experienced	blue	left	29
2015-01-16	am	26	male	experienced	blue	left	121
2015-01-16	am	27	male	experienced	compound	right	153
2015-01-16	am	28	female	experienced	blue	left	198
2015-01-16	am	29	female	experienced	compound	right	99
2015-01-16	am	30	female	experienced	compound	right	194
2015-01-09	am	1	male	experienced	compound	right	22
2015-01-09	am	2	male	experienced	compound	right	60
2015-01-09	am	3	male	experienced	compound	right	12
2015-01-09	am	4	male	experienced	blue	left	18
2015-01-09	am	5	male	experienced	blue	left	53
2015-01-09	am	6	female	experienced	compound	right	5
2015-01-09	am	7	female	experienced	compound	right	37
2015-01-09	am	8	female	experienced	blue	left	16
2015-01-09	am	9	female	experienced	blue	left	6
2015-01-09	am	10	female	experienced	blue	left	57
2015-01-09	am	11	male	experienced	compound	right	16
2015-01-09	am	12	male	experienced	blue	left	25
2015-01-09	am	13	male	experienced	compound	right	42
2015-01-09	am	14	male	experienced	blue	left	21
2015-01-09	am	15	male	experienced	compound	right	48
2015-01-09	am	16	female	experienced	blue	right	64
2015-01-09	am	17	female	experienced	compound	left	170
2015-01-09	am	18	female	experienced	blue	right	30
2015-01-09	am	19	female	experienced	compound	left	83
2015-01-09	am	20	female	experienced	blue	right	93
2015-01-09	am	21	male	experienced	blue	right	222
2015-01-09	am	22	male	experienced	compound	left	19
2015-01-09	am	23	male	experienced	compound	left	155
2015-01-09	am	24	male	experienced	blue	right	88
2015-01-09	am	25	male	experienced	compound	left	114
2015-01-09	am	26	female	experienced	blue	right	64
2015-01-09	am	27	female	experienced	blue	right	179
2015-01-09	am	28	female	experienced	compound	left	10
2015-01-09	am	29	female	experienced	compound	left	62
2015-01-09	am	30	female	experienced	blue	right	32
2014-09-16	am	1	male	naïve	bvan	right	48
2014-09-16	am	2	male	naïve	van	left	9
2014-09-16	am	3	male	naïve	van	left	8
2014-09-16	am	4	male	naïve	van	left	19
2014-09-16	am	5	male	naïve	van	left	21
2014-09-16	am	6	male	naïve	van	left	8
2014-09-16	am	7	male	naïve	bvan	right	37
2014-09-16	am	8	male	naïve	van	left	22
2014-09-16	am	9	female	naïve	van	left	14
2014-09-16	am	10	female	naïve	van	left	74
2014-09-16	am	11	female	naïve	van	left	113
2014-09-16	am	12	female	naïve	van	left	21
2014-09-16	am	13	female	naïve	van	left	96
2014-09-16	am	14	male	naïve	van	right	176
2014-09-16	am	15	male	naïve	van	right	32
2014-09-16	am	16	female	naïve	van	right	54
2014-09-16	am	17	female	naïve	van	right	38
2014-09-16	am	18	female	naïve	van	right	8
2014-09-16	am	19	female	naïve	van	right	27
2014-09-16	am	20	female	naïve	bvan	left	86
2014-09-16	am	21	male	naïve	van	right	54
2014-09-16	am	22	male	naïve	van	right	10
2014-09-16	am	23	female	naïve	van	right	20
2014-09-16	am	24	female	naïve	van	right	118
2014-09-16	am	25	female	naïve	van	right	17
2014-09-16	am	26	female	naïve	van	right	27
2014-09-16	am	27	female	naïve	bvan	left	60
2014-09-16	am	28	male	naïve	van	right	182
2014-09-16	am	29	male	naïve	van	right	9
2014-09-16	am	30	male	naïve	van	right	24
2014-09-16	am	31	female	naïve	nonresponding	nonresponding	nonresponding
2014-09-16	am	32	female	naïve	nonresponding	nonresponding	nonresponding
2014-09-16	pm	1	male	naïve	van	right	49
2014-09-16	pm	2	male	naïve	van	right	203
2014-09-16	pm	3	male	naïve	van	right	43
2014-09-16	pm	4	male	naïve	van	right	61
2014-09-16	pm	5	male	naïve	bvan	left	78
2014-09-16	pm	6	male	naïve	bvan	left	161
2014-09-16	pm	7	male	naïve	van	right	10
2014-09-16	pm	8	male	naïve	bvan	left	28
2014-09-16	pm	9	male	naïve	van	right	11
2014-09-16	pm	10	female	naïve	bvan	left	32
2014-09-16	pm	11	female	naïve	van	right	131
2014-09-16	pm	12	female	naïve	van	right	30
2014-09-16	pm	13	female	naïve	bvan	left	195
2014-09-16	pm	14	female	naïve	van	right	54
2014-09-16	pm	15	male	naïve	van	left	25
2014-09-16	pm	16	male	naïve	van	left	6
2014-09-16	pm	17	male	naïve	bvan	right	28
2014-09-16	pm	18	female	naïve	van	left	21
2014-09-16	pm	19	female	naïve	van	left	99
2014-09-16	pm	20	female	naïve	van	left	19
2014-09-16	pm	21	female	naïve	bvan	right	286
2014-09-16	pm	22	female	naïve	bvan	right	126
2014-09-16	pm	23	male	naïve	van	left	13
2014-09-16	pm	24	male	naïve	van	left	167
2014-09-16	pm	25	male	naïve	van	left	25
2014-09-16	pm	26	female	naïve	van	left	115
2014-09-16	pm	27	female	naïve	van	left	133
2014-09-16	pm	28	female	naïve	van	left	119
2014-09-16	pm	29	female	naïve	van	left	100
2014-09-16	pm	30	female	naïve	van	left	181
2014-09-16	pm	31	male	naïve	nonresponding	nonresponding	nonresponding
2014-09-17	am	1	male	naïve	van	left	69
2014-09-17	am	2	male	naïve	van	left	87
2014-09-17	am	3	male	naïve	van	left	10
2014-09-17	am	4	male	naïve	van	left	136
2014-09-17	am	5	male	naïve	van	left	128
2014-09-17	am	6	male	naïve	van	left	173
2014-09-17	am	7	male	naïve	bvan	right	24
2014-09-17	am	8	male	naïve	bvan	right	12
2014-09-17	am	9	male	naïve	bvan	right	40
2014-09-17	am	10	female	naïve	van	left	18
2014-09-17	am	11	female	naïve	bvan	right	28
2014-09-17	am	12	female	naïve	bvan	right	18
2014-09-17	am	13	female	naïve	van	left	25
2014-09-17	am	14	female	naïve	van	left	31
2014-09-17	am	15	male	naïve	van	left	117
2014-09-17	am	16	male	naïve	van	left	114
2014-09-17	am	17	male	naïve	van	left	150
2014-09-17	am	18	female	naïve	van	left	10
2014-09-17	am	19	female	naïve	van	left	173
2014-09-17	am	20	female	naïve	van	left	199
2014-09-17	am	21	female	naïve	van	left	249
2014-09-17	am	22	female	naïve	van	left	17
2014-09-17	am	23	male	naïve	van	left	14
2014-09-17	am	24	male	naïve	van	left	18
2014-09-17	am	25	male	naïve	van	left	36
2014-09-17	am	26	female	naïve	van	left	15
2014-09-17	am	27	female	naïve	bvan	right	32
2014-09-17	am	28	female	naïve	van	left	143
2014-09-17	am	29	female	naïve	van	left	64
2014-09-17	am	30	female	naïve	van	left	31
2014-09-17	am	31	male	naïve	van	left	17
2014-09-17	am	32	male	naïve	bvan	right	12
2014-09-17	am	33	male	naïve	van	left	13
2014-09-17	am	34	male	naïve	van	left	33
2014-09-17	am	35	female	naïve	van	left	108
2014-09-24	am	1	male	experienced	bvan	left	35
2014-09-24	am	2	male	experienced	bvan	left	37
2014-09-24	am	3	male	experienced	bvan	left	19
2014-09-24	am	4	female	experienced	bvan	left	84
2014-09-24	am	5	female	experienced	van	right	192
2014-09-24	am	6	female	experienced	van	right	11
2014-09-24	am	7	female	experienced	bvan	left	99
2014-09-24	am	8	male	experienced	van	right	65
2014-09-24	am	9	male	experienced	van	right	108
2014-09-24	am	10	male	experienced	bvan	left	27
2014-09-24	am	11	male	experienced	nonresponding	nonresponding	300
2014-09-24	am	12	female	experienced	van	right	85
2014-09-24	am	13	female	experienced	van	right	62
2014-09-24	am	14	female	experienced	van	right	25
2014-09-24	am	15	female	experienced	van	right	127
2014-09-24	am	16	male	experienced	van	right	8
2014-09-24	am	17	male	experienced	van	right	106
2014-09-24	am	18	male	experienced	bvan	left	149
2014-09-24	am	19	male	experienced	van	right	84
2014-09-24	am	20	male	experienced	van	right	78
2014-09-24	am	21	male	experienced	van	right	34
2014-09-24	am	22	female	experienced	van	right	74
2014-09-24	am	23	female	experienced	van	right	118
2014-09-24	am	24	female	experienced	van	right	94
2014-09-24	am	25	female	experienced	bvan	left	19
2014-09-24	am	26	male	experienced	bvan	left	74
2014-09-24	am	27	male	experienced	bvan	left	20
2014-09-24	am	28	male	experienced	van	right	14
2014-09-24	am	29	male	experienced	van	right	32
2014-09-24	am	30	male	experienced	bvan	left	234
2014-09-24	am	31	male	experienced	van	right	8
2014-09-24	am	32	female	experienced	bvan	left	11
2014-09-24	am	33	female	experienced	bvan	left	40
2014-09-24	am	34	female	experienced	van	right	31
2014-09-24	am	35	female	experienced	bvan	left	65
2014-09-24	am	36	male	experienced	bvan	left	49
2014-09-24	am	37	male	experienced	van	right	160
2015-01-16	pm	1	male	experienced	bvan	left	105
2015-01-16	pm	2	male	experienced	bvan	left	74
2015-01-16	pm	3	male	experienced	van	right	128
2015-01-16	pm	4	male	experienced	bvan	left	87
2015-01-16	pm	5	male	experienced	bvan	left	76
2015-01-16	pm	6	female	experienced	van	right	168
2015-01-16	pm	7	female	experienced	bvan	left	120
2015-01-16	pm	8	female	experienced	van	right	39
2015-01-16	pm	9	female	experienced	bvan	left	81
2015-01-16	pm	10	female	experienced	van	right	29
2015-01-16	pm	11	male	experienced	van	right	22
2015-01-16	pm	12	male	experienced	van	right	13
2015-01-16	pm	13	male	experienced	van	right	225
2015-01-16	pm	14	male	experienced	bvan	left	149
2015-01-16	pm	15	male	experienced	bvan	left	138
2015-01-16	pm	16	female	experienced	bvan	left	122
2015-01-16	pm	17	female	experienced	bvan	left	36
2015-01-16	pm	18	female	experienced	bvan	left	115
2015-01-16	pm	19	female	experienced	bvan	left	105
2015-01-16	pm	20	female	experienced	bvan	left	63
2015-01-09	pm	1	male	experienced	van	left	32
2015-01-09	pm	2	male	experienced	van	left	35
2015-01-09	pm	3	male	experienced	bvan	right	8
2015-01-09	pm	4	male	experienced	bvan	right	217
2015-01-09	pm	5	male	experienced	bvan	right	9
2015-01-09	pm	6	female	experienced	van	left	53
2015-01-09	pm	7	female	experienced	van	left	15
2015-01-09	pm	8	female	experienced	bvan	right	65
2015-01-09	pm	9	female	experienced	van	left	14
2015-01-09	pm	10	female	experienced	van	left	137
2015-01-09	pm	11	male	experienced	van	left	195
2015-01-09	pm	12	male	experienced	van	left	142
2015-01-09	pm	13	male	experienced	bvan	right	60
2015-01-09	pm	14	male	experienced	van	left	160
2015-01-09	pm	15	male	experienced	bvan	right	42
2015-01-09	pm	16	female	experienced	van	left	117
2015-01-09	pm	17	female	experienced	van	left	113
2015-01-09	pm	18	female	experienced	van	left	132
2015-01-09	pm	19	female	experienced	van	left	108
2015-01-09	pm	20	female	experienced	van	left	221

## Sheet: Latency data
sex	test	treatment	time(s)
female	visual	experienced	125
female	visual	experienced	93
female	visual	experienced	30
female	visual	experienced	27
female	visual	experienced	41
female	visual	experienced	65
female	visual	experienced	80
female	visual	experienced	148
female	visual	experienced	142
female	visual	experienced	173
female	visual	experienced	22
female	visual	experienced	181
female	visual	experienced	105
female	visual	experienced	75
female	visual	experienced	221
female	visual	experienced	260
female	visual	experienced	57
female	visual	experienced	243
female	visual	experienced	92
female	visual	experienced	23
female	visual	experienced	99
female	visual	experienced	255
female	visual	experienced	84
female	visual	experienced	163
female	visual	experienced	142
female	visual	experienced	214
female	visual	experienced	70
female	visual	experienced	131
female	visual	experienced	101
female	visual	experienced	56
female	visual	experienced	203
female	visual	experienced	106
female	visual	experienced	92
female	visual	experienced	138
female	visual	experienced	89
female	visual	experienced	103
female	visual	experienced	75
female	visual	experienced	99
female	visual	experienced	57
female	visual	experienced	92
female	visual	experienced	111
female	visual	experienced	37
female	visual	experienced	142
female	visual	experienced	9
female	visual	experienced	45
female	visual	experienced	77
female	visual	experienced	36
female	visual	experienced	130
female	visual	experienced	137
female	visual	experienced	12
female	visual	experienced	60
female	visual	experienced	198
female	visual	naïve	165
female	visual	naïve	82
female	visual	naïve	127
female	visual	naïve	129
female	visual	naïve	189
female	visual	naïve	10
female	visual	naïve	60
female	visual	naïve	88
female	visual	naïve	78
female	visual	naïve	163
female	visual	naïve	80
female	visual	naïve	138
female	visual	naïve	132
female	visual	naïve	146
female	visual	naïve	138
female	visual	naïve	184
female	visual	naïve	31
female	visual	naïve	70
female	visual	naïve	35
female	visual	naïve	290
female	visual	naïve	171
female	visual	naïve	200
female	visual	naïve	193
female	visual	naïve	248
female	visual	naïve	100
female	visual	naïve	296
female	visual	naïve	128
female	visual	naïve	76
female	visual	naïve	259
female	visual	naïve	123
female	visual	naïve	127
female	visual	naïve	186
female	visual	naïve	27
female	visual	naïve	192
female	visual	naïve	131
female	visual	naïve	20
female	visual	naïve	195
female	visual	naïve	136
female	visual	naïve	221
female	visual	naïve	220
female	visual	naïve	161
female	visual	naïve	110
female	visual	naïve	179
female	visual	naïve	194
female	visual	naïve	242
female	visual	naïve	41
female	visual	naïve	111
female	visual	naïve	123
female	visual	naïve	170
female	visual	naïve	86
female	visual	naïve	171
male	visual	experienced	19
male	visual	experienced	129
male	visual	experienced	152
male	visual	experienced	16
male	visual	experienced	31
male	visual	experienced	9
male	visual	experienced	56
male	visual	experienced	134
male	visual	experienced	102
male	visual	experienced	218
male	visual	experienced	145
male	visual	experienced	263
male	visual	experienced	76
male	visual	experienced	272
male	visual	experienced	272
male	visual	experienced	71
male	visual	experienced	49
male	visual	experienced	45
male	visual	experienced	75
male	visual	experienced	93
male	visual	experienced	259
male	visual	experienced	26
male	visual	experienced	78
male	visual	experienced	20
male	visual	experienced	48
male	visual	experienced	74
male	visual	experienced	107
male	visual	experienced	70
male	visual	experienced	174
male	visual	experienced	78
male	visual	experienced	9
male	visual	experienced	219
male	visual	experienced	27
male	visual	experienced	20
male	visual	experienced	109
male	visual	experienced	21
male	visual	experienced	93
male	visual	experienced	42
male	visual	experienced	15
male	visual	experienced	34
male	visual	experienced	12
male	visual	experienced	88
male	visual	experienced	30
male	visual	experienced	42
male	visual	experienced	115
male	visual	experienced	134
male	visual	experienced	91
male	visual	experienced	50
male	visual	experienced	53
male	visual	experienced	12
male	visual	experienced	88
male	visual	experienced	41
male	visual	experienced	67
male	visual	naïve	106
male	visual	naïve	46
male	visual	naïve	32
male	visual	naïve	244
male	visual	naïve	66
male	visual	naïve	16
male	visual	naïve	165
male	visual	naïve	16
male	visual	naïve	48
male	visual	naïve	270
male	visual	naïve	243
male	visual	naïve	203
male	visual	naïve	47
male	visual	naïve	92
male	visual	naïve	36
male	visual	naïve	72
male	visual	naïve	91
male	visual	naïve	68
male	visual	naïve	43
male	visual	naïve	17
male	visual	naïve	197
male	visual	naïve	145
male	visual	naïve	19
male	visual	naïve	154
male	visual	naïve	30
male	visual	naïve	79
male	visual	naïve	94
male	visual	naïve	204
male	visual	naïve	68
male	visual	naïve	60
male	visual	naïve	67
male	visual	naïve	20
male	visual	naïve	143
male	visual	naïve	10
male	visual	naïve	18
male	visual	naïve	219
male	visual	naïve	49
male	visual	naïve	39
male	visual	naïve	87
male	visual	naïve	45
male	visual	naïve	86
male	visual	naïve	191
male	visual	naïve	224
male	visual	naïve	102
male	visual	naïve	18
male	visual	naïve	158
male	visual	naïve	34
male	visual	naïve	38
male	visual	naïve	95
male	visual	naïve	245
male	visual	naïve	204
male	visual	naïve	58
female	olfactory	experienced	170
female	olfactory	experienced	119
female	olfactory	experienced	114
female	olfactory	experienced	169
female	olfactory	experienced	66
female	olfactory	experienced	202
female	olfactory	experienced	146
female	olfactory	experienced	287
female	olfactory	experienced	174
female	olfactory	experienced	103
female	olfactory	experienced	95
female	olfactory	experienced	177
female	olfactory	experienced	157
female	olfactory	experienced	148
female	olfactory	experienced	63
female	olfactory	experienced	116
female	olfactory	experienced	45
female	olfactory	experienced	88
female	olfactory	experienced	118
female	olfactory	experienced	134
female	olfactory	experienced	163
female	olfactory	experienced	231
female	olfactory	experienced	283
female	olfactory	experienced	163
female	olfactory	experienced	183
female	olfactory	experienced	297
female	olfactory	experienced	87
female	olfactory	experienced	158
female	olfactory	experienced	265
female	olfactory	experienced	36
female	olfactory	experienced	28
female	olfactory	experienced	97
female	olfactory	experienced	139
female	olfactory	experienced	58
female	olfactory	experienced	286
female	olfactory	experienced	82
female	olfactory	experienced	58
female	olfactory	experienced	91
female	olfactory	experienced	148
female	olfactory	experienced	69
female	olfactory	experienced	113
female	olfactory	experienced	164
female	olfactory	experienced	42
female	olfactory	experienced	100
female	olfactory	experienced	169
female	olfactory	experienced	156
female	olfactory	experienced	181
female	olfactory	experienced	16
female	olfactory	experienced	16
female	olfactory	experienced	245
female	olfactory	experienced	156
female	olfactory	experienced	49
female	olfactory	experienced	87
female	olfactory	naïve	206
female	olfactory	naïve	210
female	olfactory	naïve	212
female	olfactory	naïve	279
female	olfactory	naïve	244
female	olfactory	naïve	55
female	olfactory	naïve	132
female	olfactory	naïve	193
female	olfactory	naïve	223
female	olfactory	naïve	90
female	olfactory	naïve	122
female	olfactory	naïve	48
female	olfactory	naïve	83
female	olfactory	naïve	180
female	olfactory	naïve	175
female	olfactory	naïve	228
female	olfactory	naïve	167
female	olfactory	naïve	212
female	olfactory	naïve	106
female	olfactory	naïve	255
female	olfactory	naïve	144
female	olfactory	naïve	37
female	olfactory	naïve	120
female	olfactory	naïve	99
female	olfactory	naïve	93
female	olfactory	naïve	85
female	olfactory	naïve	152
female	olfactory	naïve	192
female	olfactory	naïve	129
female	olfactory	naïve	76
female	olfactory	naïve	92
female	olfactory	naïve	97
female	olfactory	naïve	73
female	olfactory	naïve	116
female	olfactory	naïve	120
female	olfactory	naïve	67
female	olfactory	naïve	225
female	olfactory	naïve	10
female	olfactory	naïve	60
female	olfactory	naïve	102
female	olfactory	naïve	131
female	olfactory	naïve	206
female	olfactory	naïve	114
female	olfactory	naïve	123
female	olfactory	naïve	107
female	olfactory	naïve	83
female	olfactory	naïve	37
male	olfactory	experienced	140
male	olfactory	experienced	78
male	olfactory	experienced	48
male	olfactory	experienced	48
male	olfactory	experienced	93
male	olfactory	experienced	93
male	olfactory	experienced	35
male	olfactory	experienced	176
male	olfactory	experienced	70
male	olfactory	experienced	165
male	olfactory	experienced	100
male	olfactory	experienced	44
male	olfactory	experienced	38
male	olfactory	experienced	29
male	olfactory	experienced	87
male	olfactory	experienced	43
male	olfactory	experienced	153
male	olfactory	experienced	11
male	olfactory	experienced	172
male	olfactory	experienced	128
male	olfactory	experienced	48
male	olfactory	experienced	95
male	olfactory	experienced	34
male	olfactory	experienced	227
male	olfactory	experienced	153
male	olfactory	experienced	42
male	olfactory	experienced	31
male	olfactory	experienced	178
male	olfactory	experienced	42
male	olfactory	experienced	105
male	olfactory	experienced	129
male	olfactory	experienced	30
male	olfactory	experienced	133
male	olfactory	experienced	74
male	olfactory	experienced	98
male	olfactory	experienced	177
male	olfactory	experienced	130
male	olfactory	experienced	116
male	olfactory	experienced	168
male	olfactory	experienced	159
male	olfactory	experienced	78
male	olfactory	experienced	91
male	olfactory	experienced	208
male	olfactory	experienced	106
male	olfactory	experienced	41
male	olfactory	experienced	110
male	olfactory	experienced	46
male	olfactory	experienced	187
male	olfactory	experienced	43
male	olfactory	experienced	92
male	olfactory	naïve	43
male	olfactory	naïve	186
male	olfactory	naïve	25
male	olfactory	naïve	108
male	olfactory	naïve	96
male	olfactory	naïve	274
male	olfactory	naïve	7
male	olfactory	naïve	131
male	olfactory	naïve	88
male	olfactory	naïve	135
male	olfactory	naïve	54
male	olfactory	naïve	88
male	olfactory	naïve	187
male	olfactory	naïve	154
male	olfactory	naïve	43
male	olfactory	naïve	228
male	olfactory	naïve	107
male	olfactory	naïve	29
male	olfactory	naïve	232
male	olfactory	naïve	241
male	olfactory	naïve	161
male	olfactory	naïve	47
male	olfactory	naïve	119
male	olfactory	naïve	66
male	olfactory	naïve	159
male	olfactory	naïve	156
male	olfactory	naïve	42
male	olfactory	naïve	76
male	olfactory	naïve	77
male	olfactory	naïve	139
male	olfactory	naïve	104
male	olfactory	naïve	57
male	olfactory	naïve	52
male	olfactory	naïve	66
male	olfactory	naïve	29
male	olfactory	naïve	75
male	olfactory	naïve	27
male	olfactory	naïve	124
male	olfactory	naïve	112
male	olfactory	naïve	134
male	olfactory	naïve	205
male	olfactory	naïve	92
male	olfactory	naïve	130
male	olfactory	naïve	65
male	olfactory	naïve	191
male	olfactory	naïve	17
male	olfactory	naïve	27
male	olfactory	naïve	78
